# Supplementary material for: Regulating the magnetic properties of seven-coordinated Dy(iii) single-ion magnets through the effect of positional isomers on axial crystal-field
Source: Royal Society of Chemistry journal article supplement (doi:10.1039/d1dt02925h), 2021-01-01
Supplement: d1dt02925h1.pdf [file d1dt02925h1.pdf]

## Supporting Information

# Regulating the magnetic properties of seven-coordinated Dy(III) single-ion magnets through the effect of positional isomers on axial crystal-field

Yubao Dong,<sup>†a</sup> Li Zhu,<sup>†a</sup> Bing Yin,<sup>\*b</sup> Xinrui Zhu<sup>a</sup> and Dongfeng Li<sup>\*a</sup>

<sup>a</sup> Key Laboratory of Pesticide and Chemical Biology, Ministry of Education, College of Chemistry, Central China Normal University, Wuhan 430079, P. R. China

<sup>b</sup> Key Laboratory of Synthetic and Natural Functional Molecule Chemistry of Ministry of Education, Lab of Molecular Magnetism College of Chemistry and Materials Science, Northwest University, Xi'an 710127, P. R. China

## Table of contents

|                                                                                                                                  |     |
|----------------------------------------------------------------------------------------------------------------------------------|-----|
| <b>X-ray crystallographic data</b> .....                                                                                         | S3  |
| <b>X-ray powder diffraction and IR spectra</b> .....                                                                             | S7  |
| <b>Crystal structures</b> .....                                                                                                  | S8  |
| <b>Magnetic measurements</b> .....                                                                                               | S10 |
| <b>Fitting for the complexes</b> .....                                                                                           | S21 |
| <b>Magnetization hysteresis</b> .....                                                                                            | S24 |
| <b>Fitting parameters</b> .....                                                                                                  | S25 |
| <b>Theoretical analysis</b> .....                                                                                                | S31 |
| <b>The <math>^1\text{H}</math> NMR and <math>^{13}\text{C}</math> spectra of n-OMe-<math>\text{H}_2\text{bbpen}</math></b> ..... | S33 |

## X-ray crystallographic data

**Table S1a.** Crystallographic data and structure refinement parameters for **1**, **3** and **5**.

| Complex                                             | <b>1</b>                                                          | <b>3</b>                                                          | <b>5</b>                                                          |
|-----------------------------------------------------|-------------------------------------------------------------------|-------------------------------------------------------------------|-------------------------------------------------------------------|
| Formula                                             | C <sub>30</sub> H <sub>32</sub> ClDyN <sub>4</sub> O <sub>4</sub> | C <sub>30</sub> H <sub>32</sub> ClDyN <sub>4</sub> O <sub>4</sub> | C <sub>30</sub> H <sub>32</sub> ClDyN <sub>4</sub> O <sub>4</sub> |
| Formula weight                                      | 710.54                                                            | 710.54                                                            | 710.54                                                            |
| Temperature / K                                     | 296                                                               | 296                                                               | 296                                                               |
| Crystal system                                      | Orthorhombic                                                      | Monoclinic                                                        | Orthorhombic                                                      |
| Space group                                         | <i>P</i> 2 <sub>1</sub> 2 <sub>1</sub> 2 <sub>1</sub>             | <i>C</i> 2/ <i>c</i>                                              | <i>P</i> bcn                                                      |
| <i>a</i> / Å                                        | 8.6071 (13)                                                       | 21.062 (2)                                                        | 8.6217 (12)                                                       |
| <i>b</i> / Å                                        | 17.845 (3)                                                        | 9.5266 (10)                                                       | 17.052 (2)                                                        |
| <i>c</i> / Å                                        | 18.836 (3)                                                        | 15.5658 (14)                                                      | 19.783 (3)                                                        |
| <i>α</i> / °                                        | 90                                                                | 90                                                                | 90                                                                |
| <i>β</i> / °                                        | 90                                                                | 114.012 (4)                                                       | 90                                                                |
| <i>γ</i> / °                                        | 90                                                                | 90                                                                | 90                                                                |
| <i>V</i> / Å <sup>3</sup>                           | 2893.1 (8)                                                        | 2853.0 (5)                                                        | 2908.5 (7)                                                        |
| <i>Z</i>                                            | 4                                                                 | 4                                                                 | 4                                                                 |
| <i>F</i> (000)                                      | 1420                                                              | 1420                                                              | 1420                                                              |
| <i>D</i> <sub>calc</sub> / Mg m <sup>-3</sup>       | 1.631                                                             | 1.654                                                             | 1.623                                                             |
| Mo Kα / Å                                           | 0.71073                                                           | 0.71073                                                           | 0.71073                                                           |
| <i>R</i> <sub>1</sub> [ <i>I</i> > 2σ( <i>I</i> )]  | 0.0154                                                            | 0.0232                                                            | 0.0279                                                            |
| <i>wR</i> <sub>2</sub> [ <i>I</i> > 2σ( <i>I</i> )] | 0.0368                                                            | 0.0470                                                            | 0.0559                                                            |
| <i>R</i> <sub>1</sub> , (all data)                  | 0.0162                                                            | 0.0263                                                            | 0.0431                                                            |
| <i>wR</i> <sub>2</sub> , (all data)                 | 0.0371                                                            | 0.0485                                                            | 0.0641                                                            |
| <i>μ</i> / mm <sup>-1</sup>                         | 2.72                                                              | 2.76                                                              | 2.70                                                              |
| <i>R</i> <sub>int</sub>                             | 0.021                                                             | 0.040                                                             | 0.030                                                             |
| Collected reflections                               | 22377                                                             | 23382                                                             | 24106                                                             |
| Unique reflections                                  | 5894                                                              | 4398                                                              | 3528                                                              |
| Goodness-of-fit on <i>F</i> <sup>2</sup>            | 1.14                                                              | 1.06                                                              | 1.26                                                              |

**Table S1b.** Crystal data and structure refinement parameters for **2**, **4** and **6**.

| Complex                                             | <b>2</b>                                                          | <b>4</b>                                                          | <b>6</b>                                                          |
|-----------------------------------------------------|-------------------------------------------------------------------|-------------------------------------------------------------------|-------------------------------------------------------------------|
| Formula                                             | C <sub>30</sub> H <sub>32</sub> BrDyN <sub>4</sub> O <sub>4</sub> | C <sub>30</sub> H <sub>32</sub> BrDyN <sub>4</sub> O <sub>4</sub> | C <sub>30</sub> H <sub>32</sub> ClDyN <sub>4</sub> O <sub>4</sub> |
| Formula weight                                      | 755.00                                                            | 755.00                                                            | 710.54                                                            |
| Temperature / K                                     | 296                                                               | 296                                                               | 296                                                               |
| Crystal system                                      | Orthorhombic                                                      | Monoclinic                                                        | Orthorhombic                                                      |
| Space group                                         | <i>P</i> 2 <sub>1</sub> 2 <sub>1</sub> 2 <sub>1</sub>             | <i>C</i> 2/ <i>c</i>                                              | <i>P</i> bcn                                                      |
| <i>a</i> / Å                                        | 8.5766 (7)                                                        | 20.971 (2)                                                        | 8.6618 (8)                                                        |
| <i>b</i> / Å                                        | 18.0373 (14)                                                      | 9.7062 (11)                                                       | 17.2729 (16)                                                      |
| <i>c</i> / Å                                        | 18.8912 (15)                                                      | 15.6099 (17)                                                      | 19.7054 (18)                                                      |
| <i>α</i> / °                                        | 90                                                                | 90                                                                | 90                                                                |
| <i>β</i> / °                                        | 90                                                                | 113.913                                                           | 90                                                                |
| <i>γ</i> / °                                        | 90                                                                | 90                                                                | 90                                                                |
| <i>V</i> / Å <sup>3</sup>                           | 2922.4 (4)                                                        | 2904.7 (6)                                                        | 2948.2 (5)                                                        |
| <i>Z</i>                                            | 4                                                                 | 4                                                                 | 4                                                                 |
| <i>F</i> (000)                                      | 1492                                                              | 1492                                                              | 1492                                                              |
| <i>D</i> <sub>calc</sub> / Mg m <sup>-3</sup>       | 1.716                                                             | 1.726                                                             | 1.701                                                             |
| Mo Kα / Å                                           | 0.71073                                                           | 0.71073                                                           | 0.71073                                                           |
| <i>R</i> <sub>1</sub> [ <i>I</i> > 2σ( <i>I</i> )]  | 0.0220                                                            | 0.0182                                                            | 0.0292                                                            |
| <i>wR</i> <sub>2</sub> [ <i>I</i> > 2σ( <i>I</i> )] | 0.0463                                                            | 0.0472                                                            | 0.0583                                                            |
| <i>R</i> <sub>1</sub> , (all data)                  | 0.0261                                                            | 0.0208                                                            | 0.0417                                                            |
| <i>wR</i> <sub>2</sub> , (all data)                 | 0.0475                                                            | 0.0486                                                            | 0.0650                                                            |
| <i>μ</i> / mm <sup>-1</sup>                         | 3.97                                                              | 3.99                                                              | 3.93                                                              |
| <i>R</i> <sub>int</sub>                             | 0.030                                                             | 0.026                                                             | 0.033                                                             |
| Collected reflections                               | 20494                                                             | 12319                                                             | 43412                                                             |
| Unique reflections                                  | 5169                                                              | 3476                                                              | 3028                                                              |
| Goodness-of-fit on <i>F</i> <sup>2</sup>            | 1.07                                                              | 1.12                                                              | 1.17                                                              |

**Table S2.** Selected bond distances (Å) and bond angles (°) for **1–6**.

| Bond distances (Å) |             |             |             |
|--------------------|-------------|-------------|-------------|
| Complex 1          |             | Complex 2   |             |
| Dy(1)-Cl(1)        | 2.6647 (8)  | Dy(1)-Br(1) | 2.8412 (5)  |
| Dy(1)-O(1)         | 2.156 (2)   | Dy(1)-O(1)  | 2.135 (3)   |
| Dy(1)-O(2)         | 2.153 (2)   | Dy(1)-O(2)  | 2.150 (3)   |
| Dy(1)-N(1)         | 2.558 (3)   | Dy(1)-N(1)  | 2.563 (4)   |
| Dy(1)-N(2)         | 2.603 (2)   | Dy(1)-N(2)  | 2.599 (4)   |
| Dy(1)-N(3)         | 2.596 (2)   | Dy(1)-N(3)  | 2.588 (4)   |
| Dy(1)-N(4)         | 2.571 (3)   | Dy(1)-N(4)  | 2.599 (4)   |
| Complex 3          |             | Complex 4   |             |
| Dy(1)-Cl(1)        | 2.6294 (7)  | Dy(1)-Br(1) | 2.7892 (4)  |
| Dy(1)-O(1)         | 2.1697 (14) | Dy(1)-O(1)  | 2.1666 (17) |
| Dy(1)-N(1)         | 2.5440 (17) | Dy(1)-N(1)  | 2.5610 (18) |
| Dy(1)-N(2)         | 2.5854 (16) | Dy(1)-N(2)  | 2.5770 (17) |
| Complex 5          |             | Complex 6   |             |
| Dy(1)-Cl(1)        | 2.6641 (11) | Dy(1)-Br(1) | 2.8228 (6)  |
| Dy(1)-O(1)         | 2.165 (2)   | Dy(1)-O(1)  | 2.155 (3)   |
| Dy(1)-N(1)         | 2.586 (3)   | Dy(1)-N(1)  | 2.595 (4)   |
| Dy(1)-N(2)         | 2.579 (3)   | Dy(1)-N(2)  | 2.570 (3)   |
| Bond angles (°)    |             |             |             |
| Complex 1          |             | Complex 2   |             |
| O1-Dy1-O2          | 157.02 (9)  | O1-Dy1-O2   | 157.79 (13) |
| O1-Dy1-Cl1         | 99.48 (6)   | O1-Dy1-Br1  | 104.28 (9)  |
| O1-Dy1-N1          | 89.72 (9)   | O1-Dy1-N1   | 92.37 (14)  |
| O1-Dy1-N2          | 84.23 (8)   | O1-Dy1-N2   | 76.99 (13)  |
| O2-Dy1-Cl1         | 103.49 (6)  | O2-Dy1-Br1  | 97.89 (9)   |
| O2-Dy1-N1          | 93.19 (9)   | O2-Dy1-N1   | 89.78 (14)  |
| O2-Dy1-N2          | 76.41 (8)   | O2-Dy1-N2   | 83.97 (13)  |
| O2-Dy1-N3          | 85.05 (8)   | O2-Dy1-N3   | 76.62 (12)  |
| O2-Dy1-N4          | 88.09 (9)   | O2-Dy1-N4   | 97.05 (14)  |

|                  |             |                  |             |
|------------------|-------------|------------------|-------------|
| N1-Dy1-C11       | 80.76 (7)   | N1-Dy1-Br1       | 80.72 (10)  |
| N1-Dy1-N3        | 132.81 (9)  | N1-Dy1-N3        | 132.91 (14) |
| N1-Dy1-N4        | 161.59 (10) | N1-Dy1-N4        | 161.68 (15) |
| N2-Dy1-C11       | 145.74 (6)  | N2-Dy1-Br1       | 145.64 (9)  |
| N3-Dy1-C11       | 145.44 (6)  | N3-Dy1-Br1       | 145.11 (9)  |
| N4-Dy1-C11       | 81.08 (7)   | N4-Dy1-Br1       | 81.50 (10)  |
| N4-Dy1-N2        | 132.69 (9)  | N4-Dy1-N2        | 132.54 (13) |
| <b>Complex 3</b> |             | <b>Complex 4</b> |             |
| O1-Dy1-O1A       | 170.65 (7)  | O1-Dy1-O1A       | 171.58 (8)  |
| O1-Dy1-C11       | 94.68 (4)   | O1-Dy1-Br1       | 94.21 (4)   |
| O1-Dy1-N1        | 101.98 (6)  | O1-Dy1-N1        | 101.73 (7)  |
| O1-Dy1-N2        | 74.17 (5)   | O1-Dy1-N2        | 74.40 (6)   |
| O1A-Dy1-N2       | 97.97 (6)   | O1A-Dy1-N2       | 98.52 (6)   |
| N1-Dy1-C11       | 85.23 (4)   | N1-Dy1-Br1       | 85.24 (4)   |
| N1-Dy1-N1A       | 170.45 (7)  | N1-Dy1-N1A       | 170.47 (8)  |
| N2-Dy1-C11       | 145.41 (4)  | N2-Dy1-Br1       | 145.31 (4)  |
| <b>Complex 5</b> |             | <b>Complex 6</b> |             |
| O1-Dy1-O1A       | 157.44 (12) | O1-Dy1-O1A       | 158.29 (14) |
| O1-Dy1-C11       | 101.28 (6)  | O1-Dy1-Br1       | 100.86 (7)  |
| O1-Dy1-N1        | 97.04 (10)  | O1-Dy1-N1        | 96.60 (11)  |
| O1-Dy1-N2        | 77.51 (9)   | O1-Dy1-N2        | 77.82 (10)  |
| O1A-Dy1-N2       | 84.00 (9)   | O1A-Dy1-N2       | 84.39 (10)  |
| N1-Dy1-C11       | 80.59 (6)   | N1-Dy1-Br1       | 80.63 (7)   |
| N1-Dy1-N1A       | 161.17 (13) | N1-Dy1-N1A       | 161.25 (14) |
| N2-Dy1-C11       | 145.08 (6)  | N2-Dy1-Br1       | 145.03 (7)  |

## X-ray powder diffraction and IR spectra

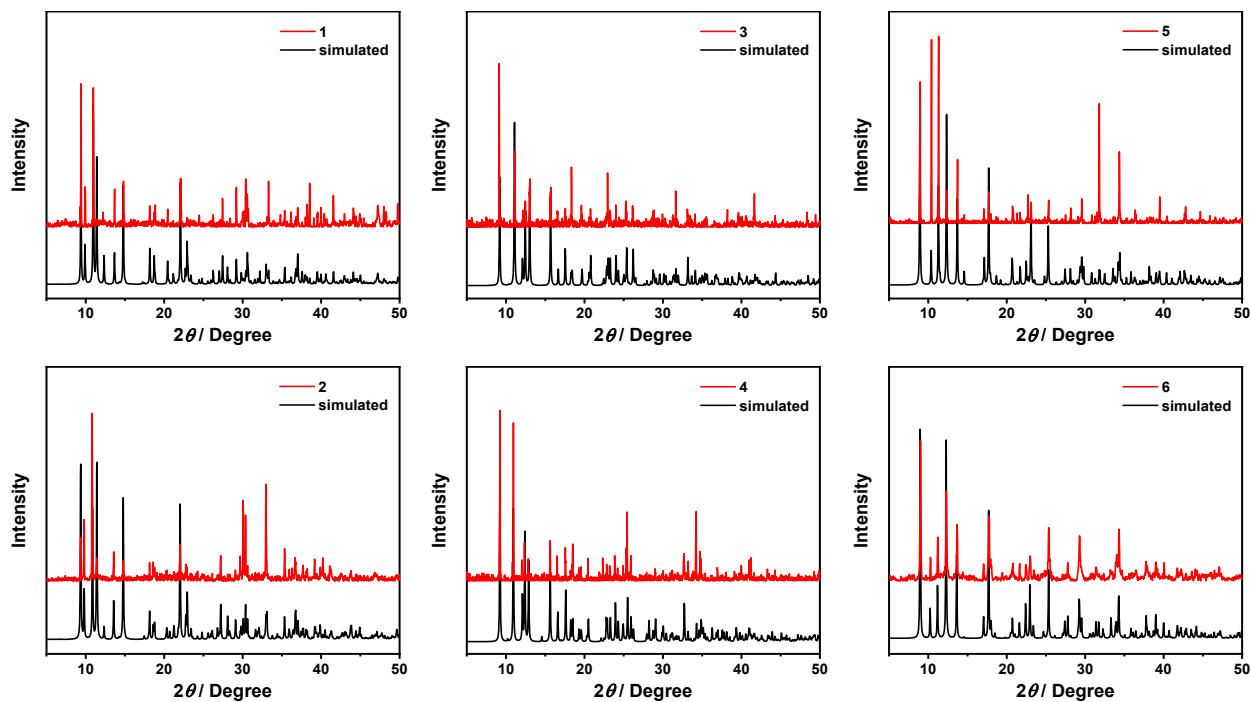

Figure S1. PXRD patterns of complexes 1–6.

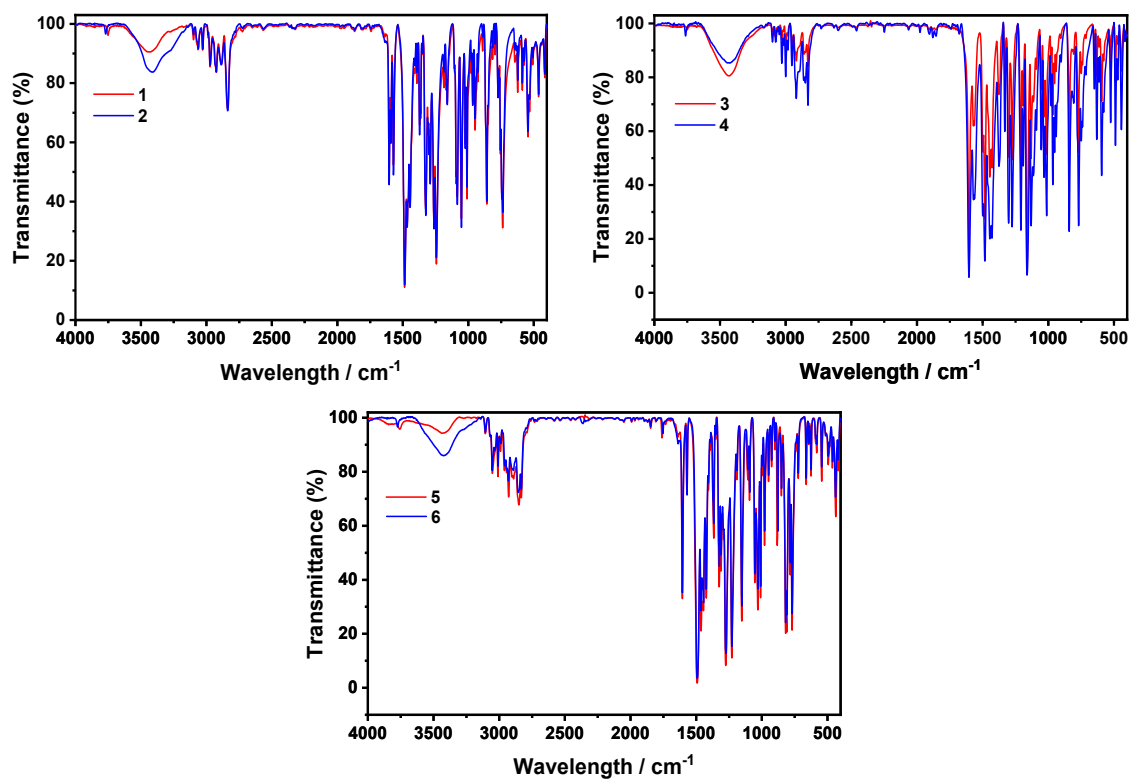

Figure S2. Infrared spectra of complexes 1–6.

## Crystal structures

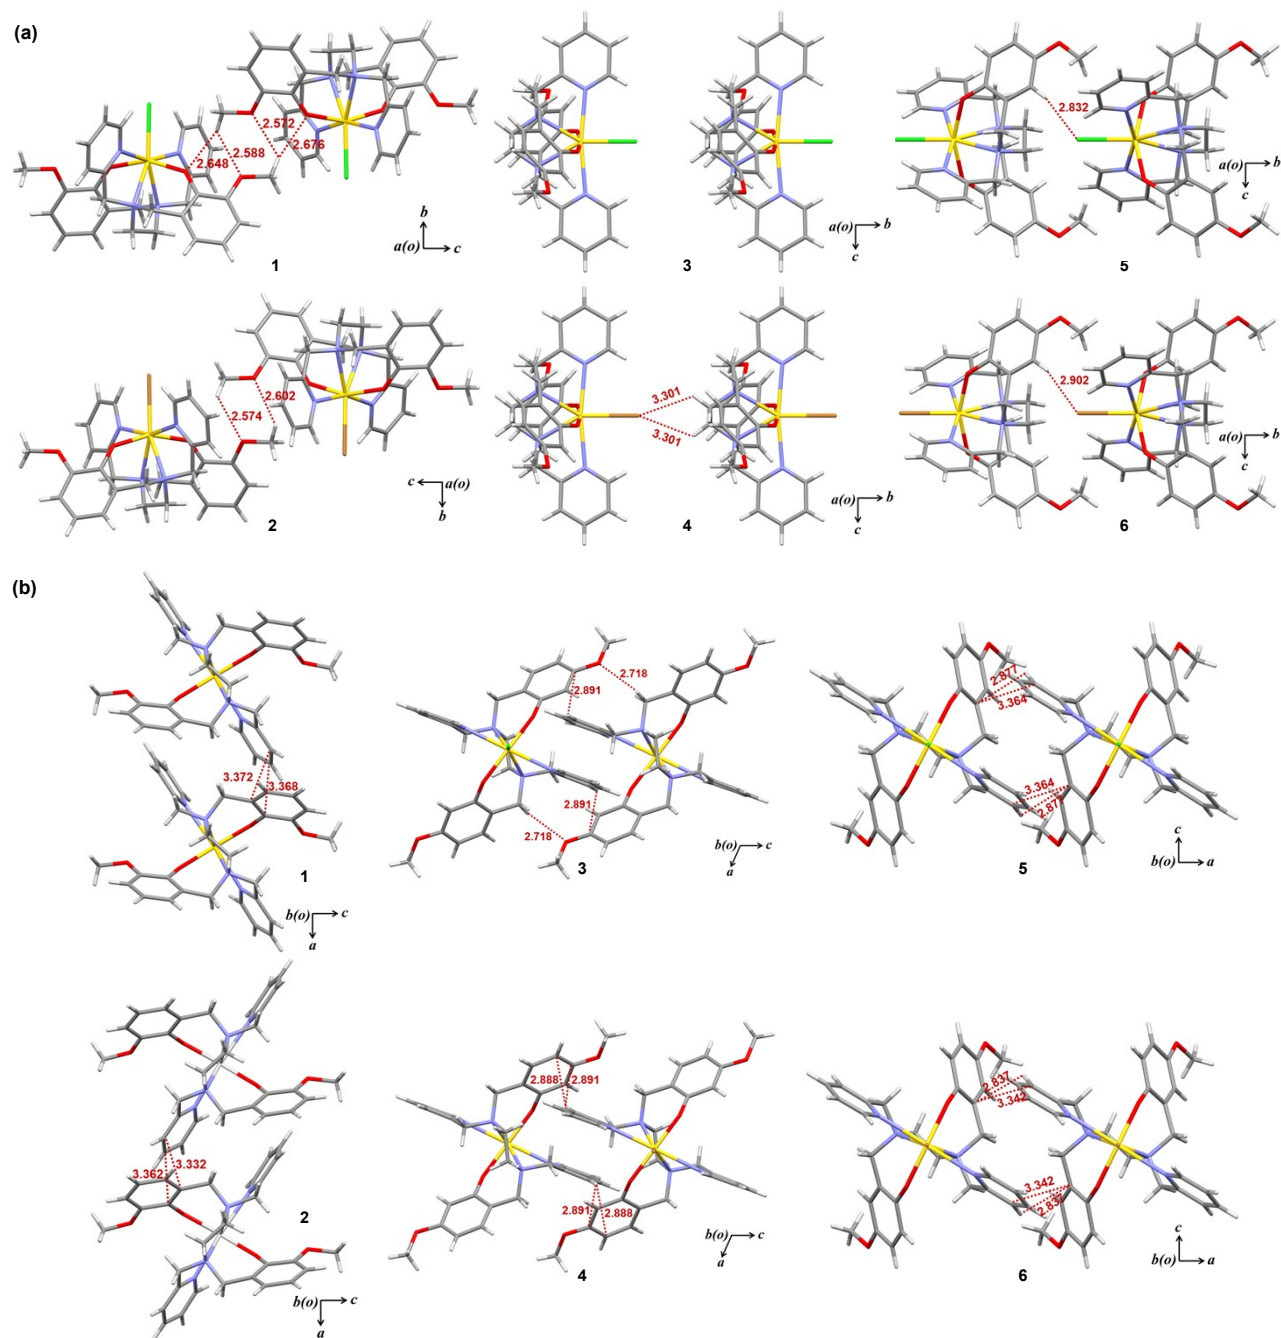



**Table S3.** The calculated results for Dy<sup>III</sup> ions configuration of complexes **1–6** by SHAPE 2.0 Software.

| Configuration                                        | 1            | 2            | 3            | 4            | 5            | 6            |
|------------------------------------------------------|--------------|--------------|--------------|--------------|--------------|--------------|
| Heptagon ( $D_{7h}$ )                                | 33.903       | 34.091       | 34.687       | 34.749       | 33.762       | 34.007       |
| Hexagonal pyramid ( $C_{6v}$ )                       | 23.303       | 23.516       | 21.419       | 21.812       | 23.181       | 23.361       |
| Pentagonal bipyramid ( $D_{5h}$ )                    | <b>1.895</b> | <b>2.277</b> | 4.032        | 4.327        | <b>1.866</b> | <b>2.152</b> |
| Capped octahedron ( $C_{3v}$ )                       | 7.607        | 8.001        | 4.339        | 4.617        | 8.493        | 8.849        |
| Capped trigonal prism ( $C_{2v}$ )                   | 6.189        | 6.546        | <b>3.491</b> | <b>3.768</b> | 6.709        | 7.010        |
| Johnson pentagonal bipyramid J13 ( $D_{5h}$ )        | 2.267        | 2.331        | 5.154        | 5.222        | 2.281        | 2.332        |
| Johnson elongated triangular pyramid J7 ( $C_{3v}$ ) | 21.998       | 22.54        | 21.294       | 21.783       | 21.154       | 21.752       |

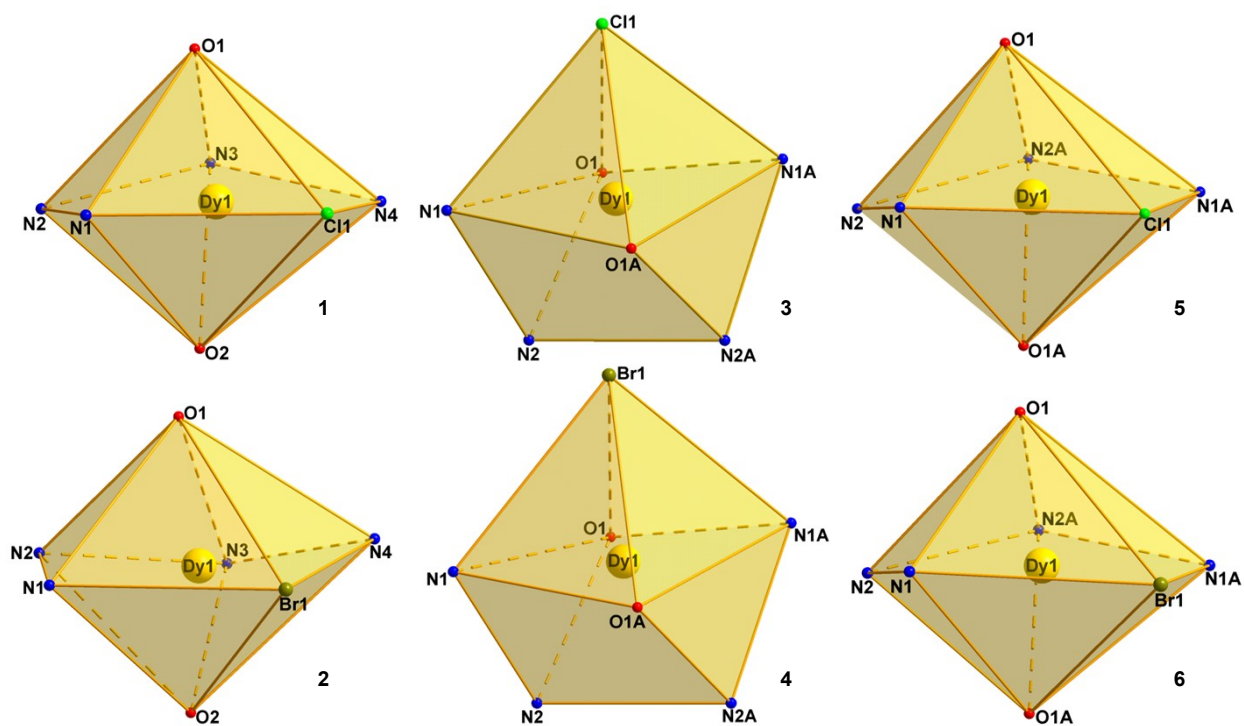

**Figure S4.** Polyhedrons around Dy<sup>III</sup> ion for complexes **1–6**.

## Magnetic measurements

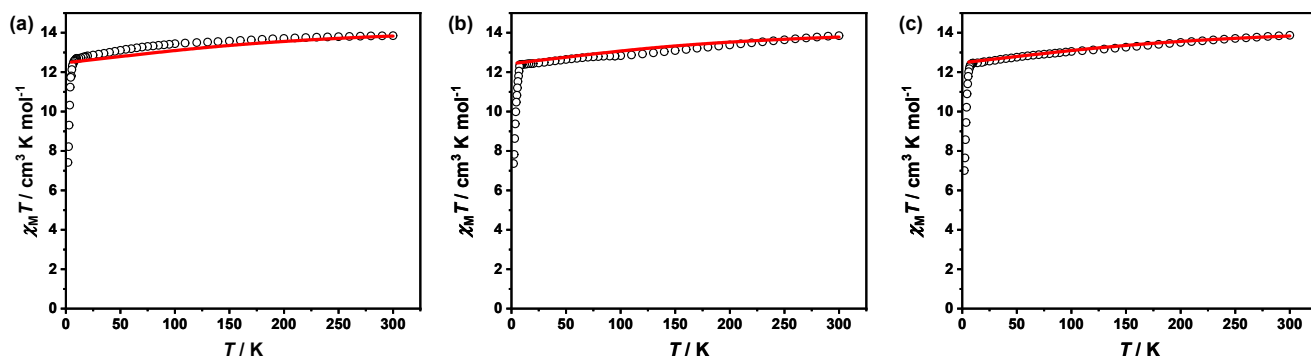

**Figure S5.** The variable-temperature magnetic susceptibilities of **1**, **3** and **5**. Solid lines correspond to the *ab initio* calculation results.

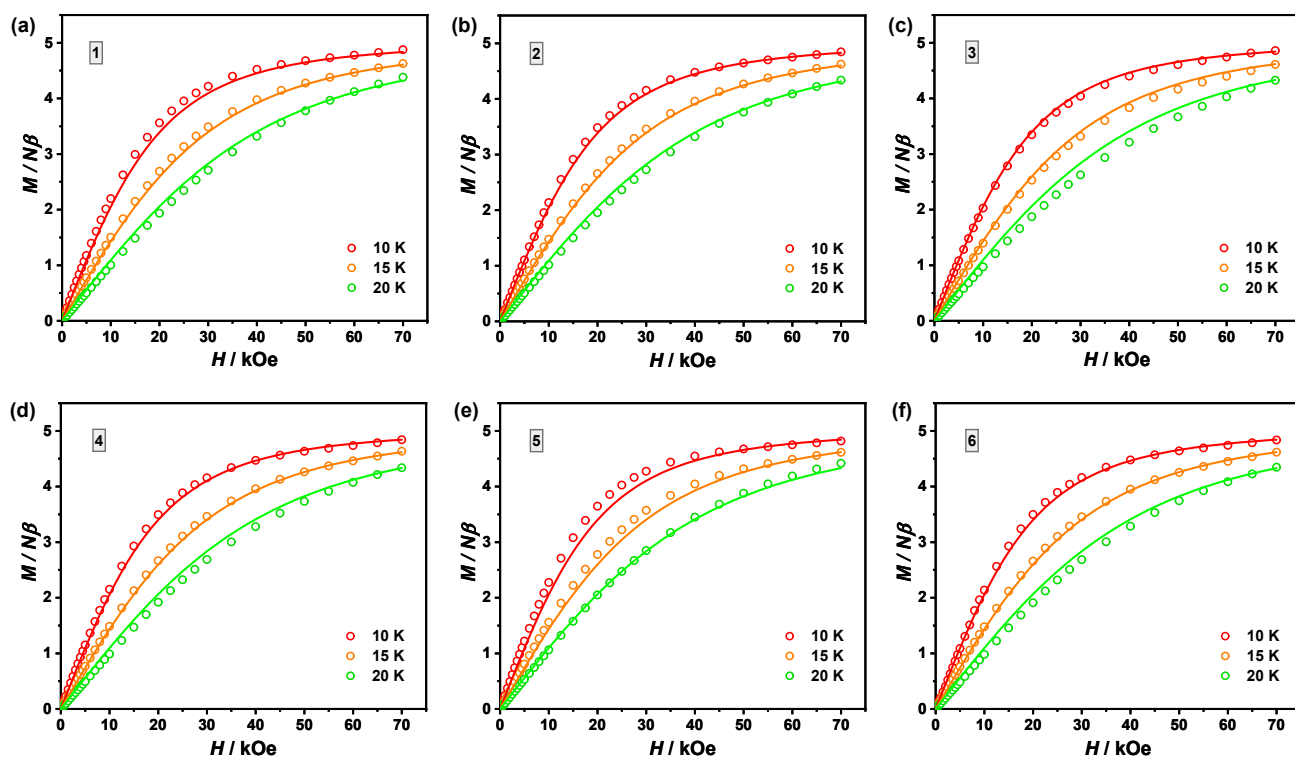

**Figure S6.** Field dependent magnetization data for complexes **1–6** at 2 K. Data were collected from 0 to 70 kOe in steady fields. Solid lines correspond to the *ab initio* calculation results.

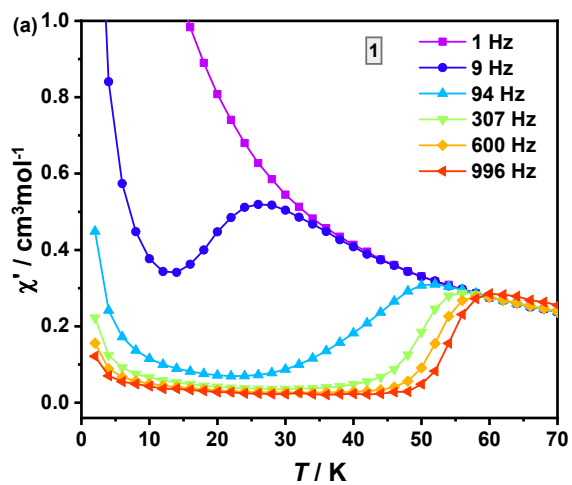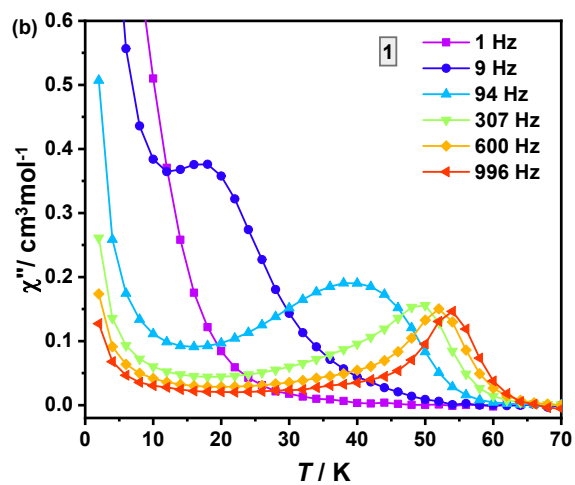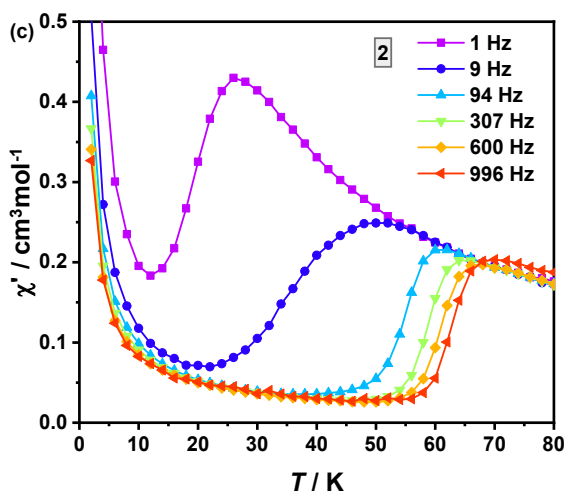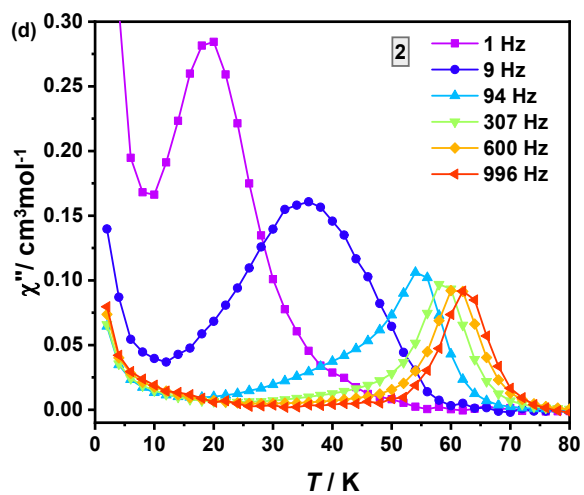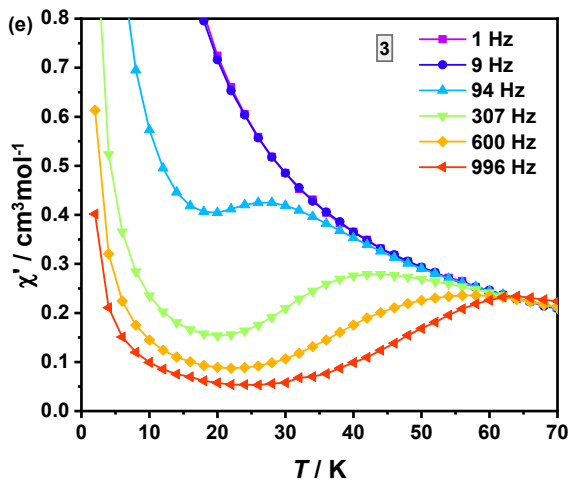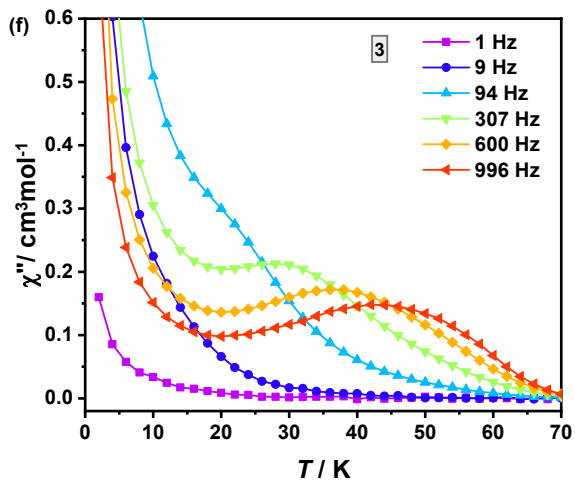

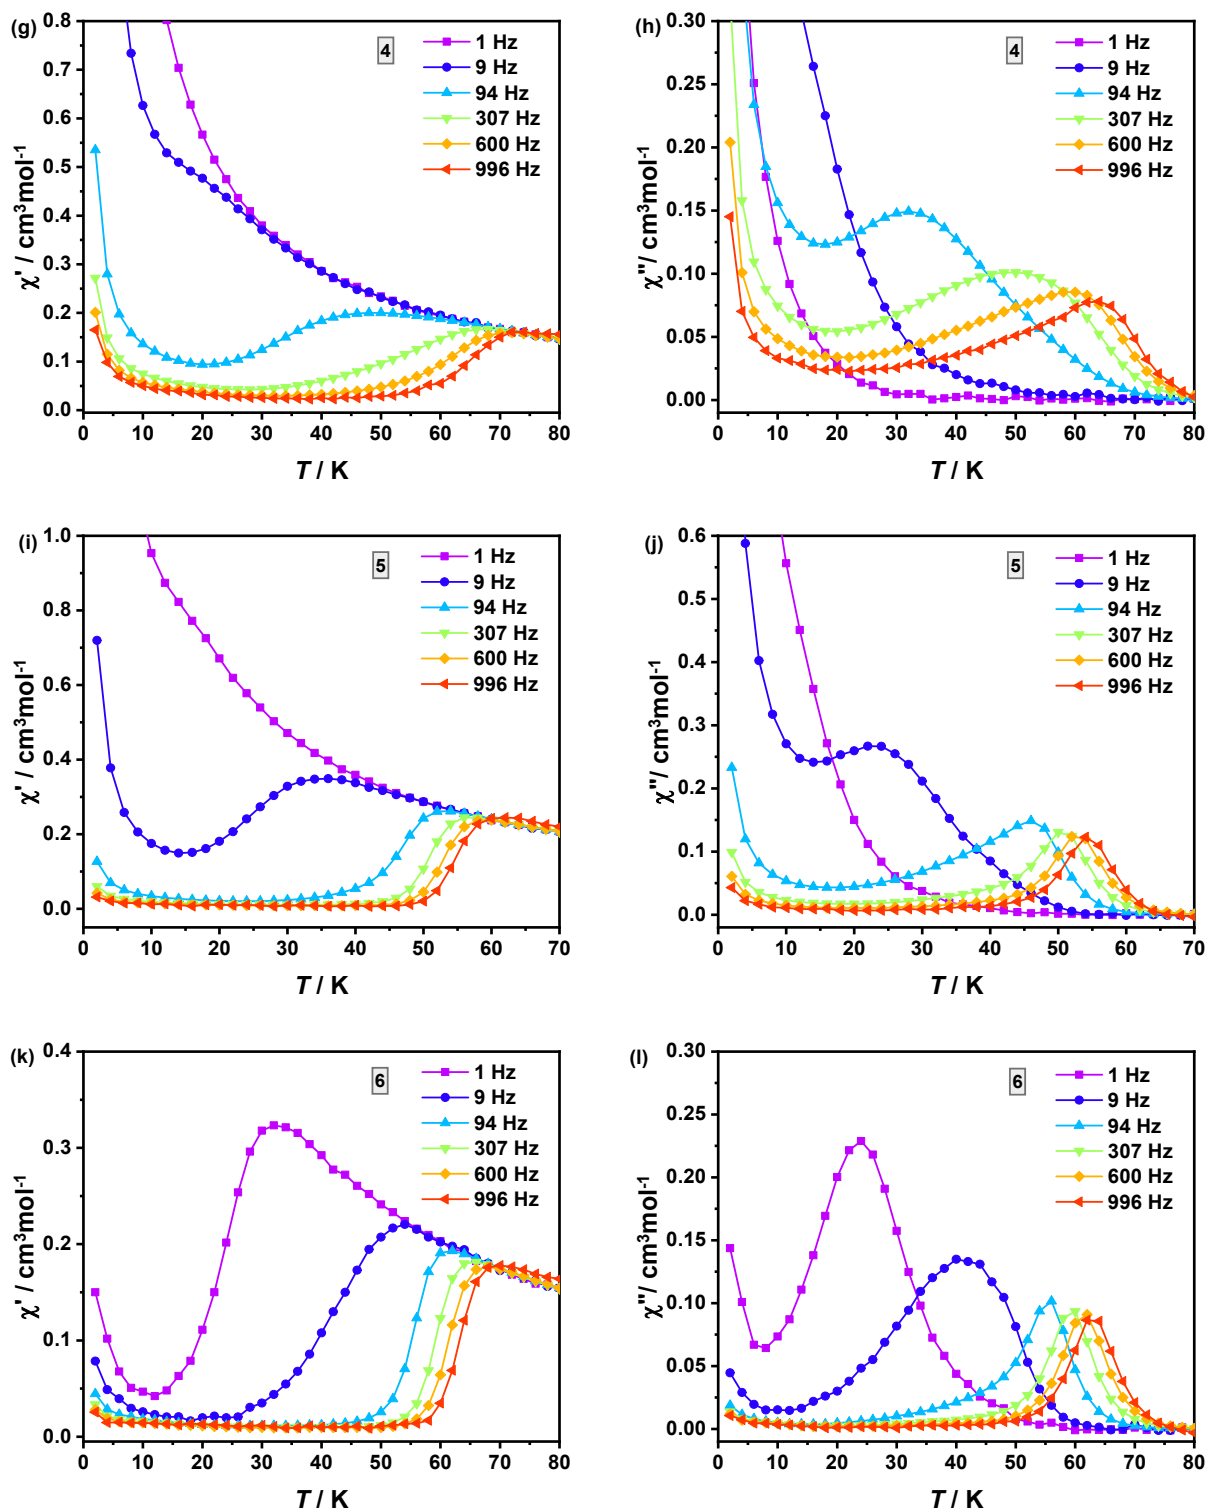

**Figure S7.** Temperature-dependence of in-phase ( $\chi'$ ) and out-of-phase ( $\chi''$ ) ac susceptibility of 1–6 in zero dc field.

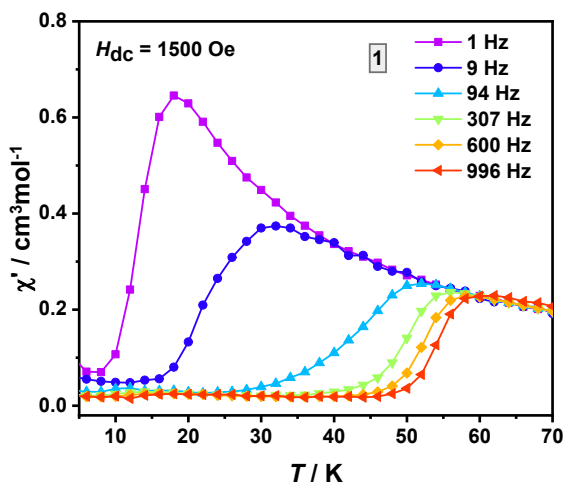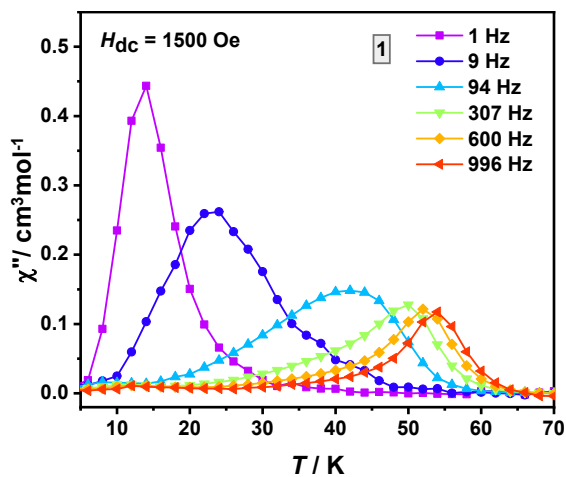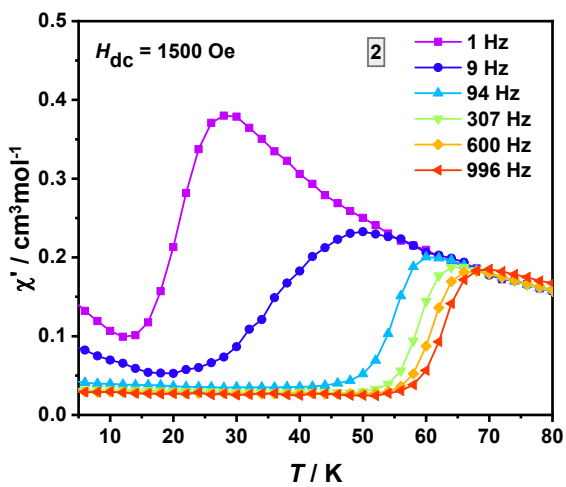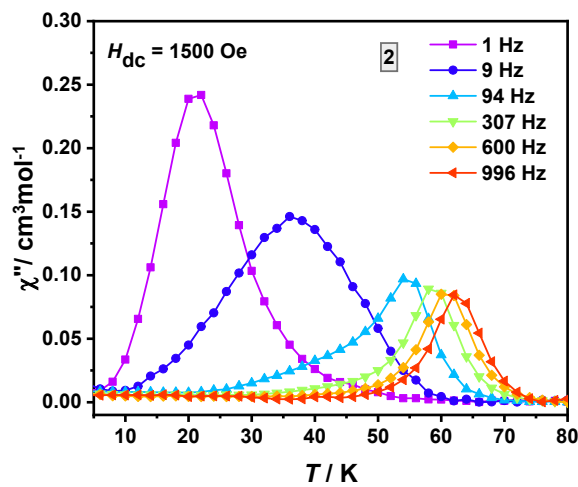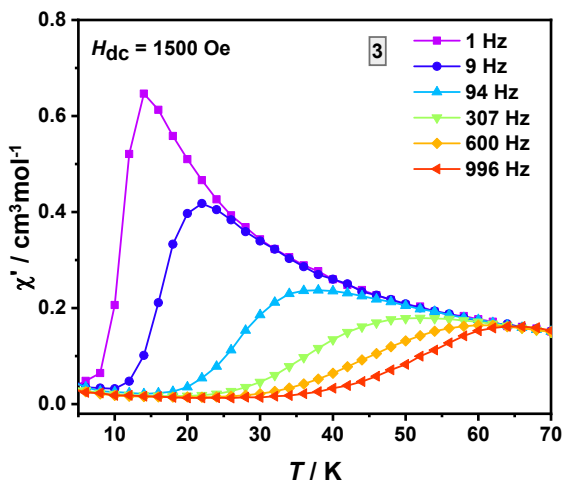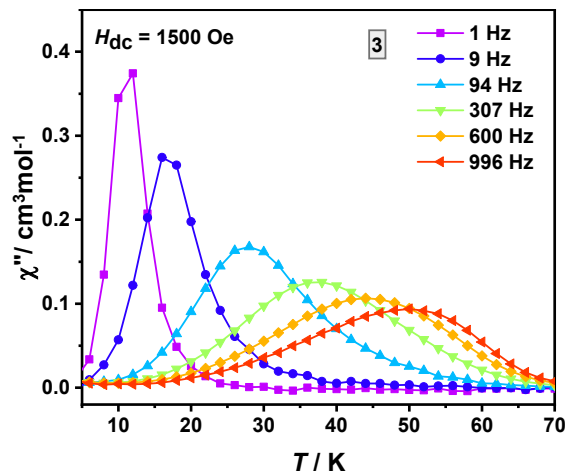

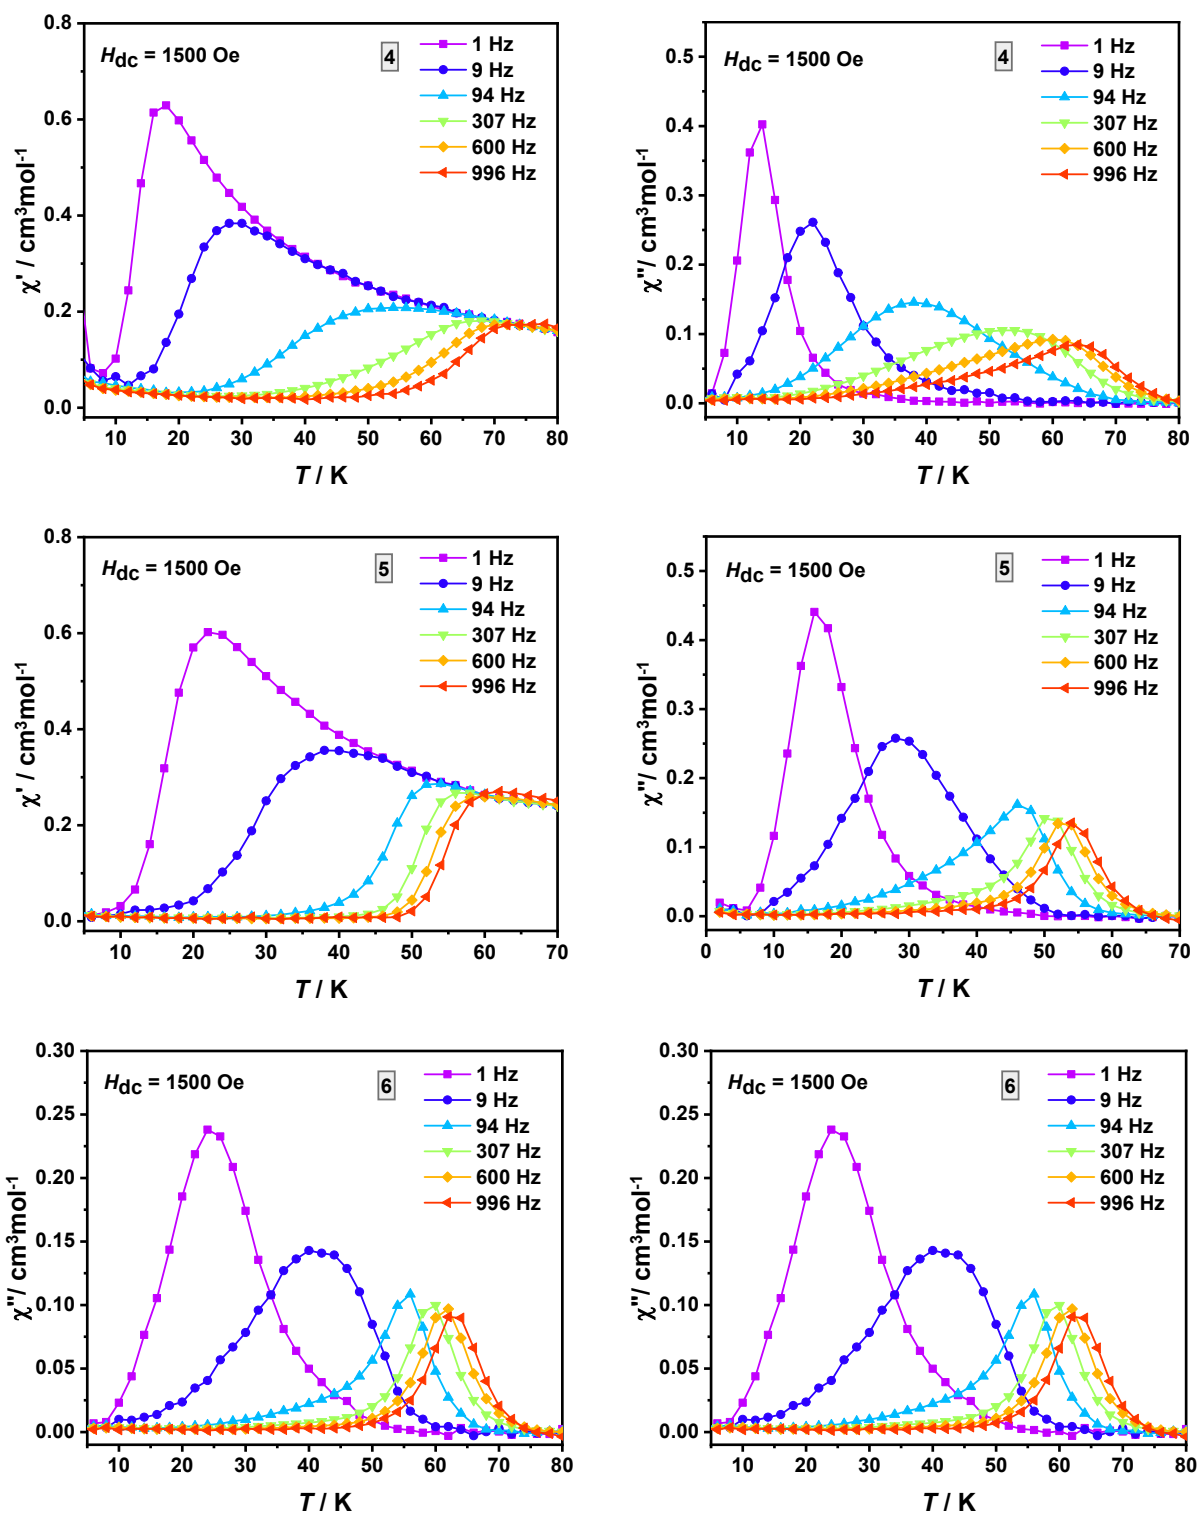

**Figure S8.** Temperature-dependence of in-phase ( $\chi'$ ) and out-of-phase ( $\chi''$ ) ac susceptibility of 1–6 under 1500 Oe applied dc field.

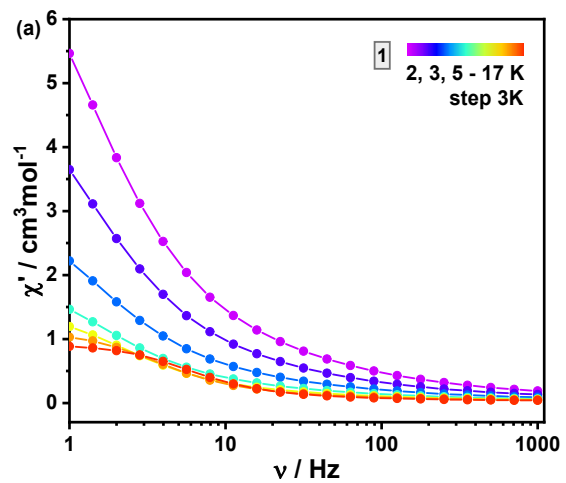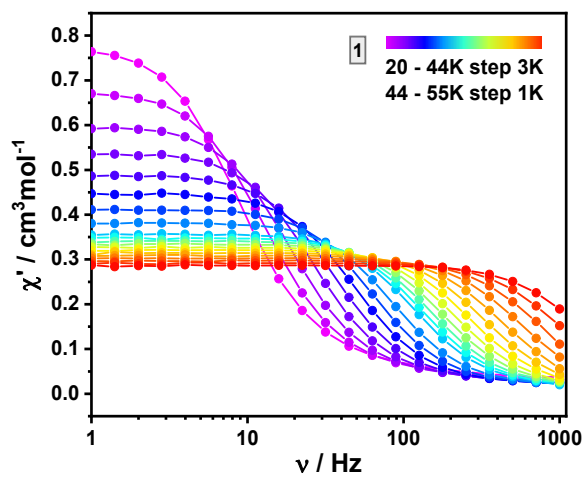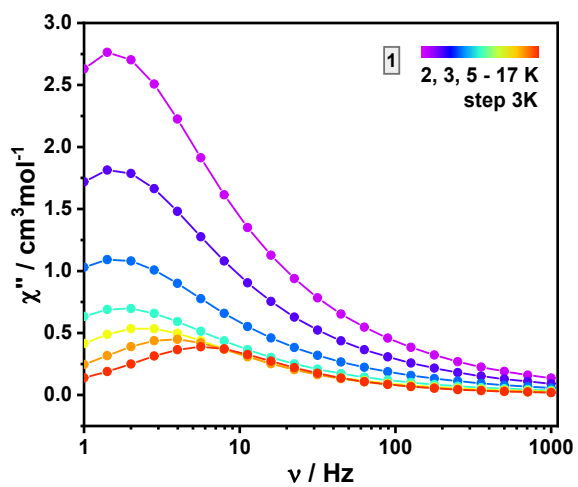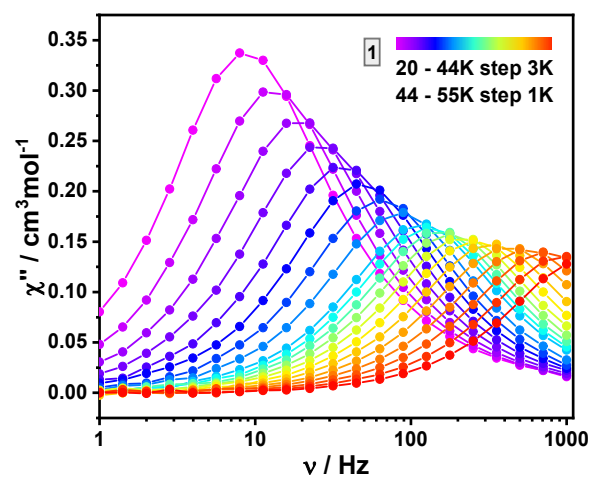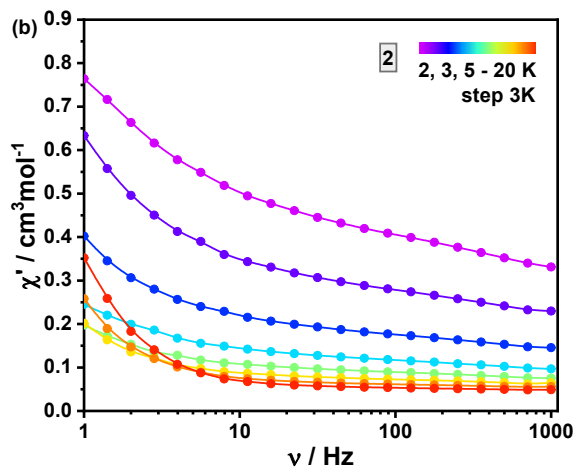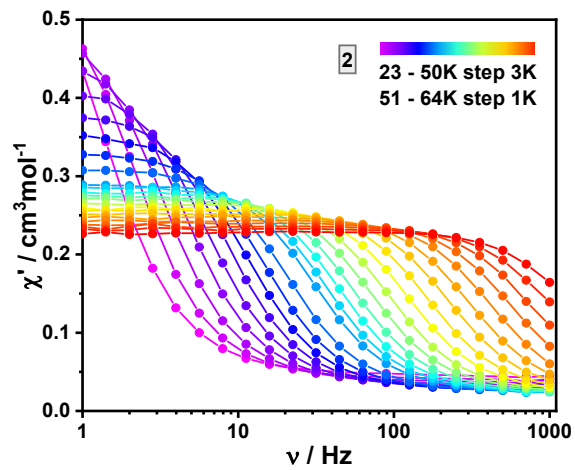

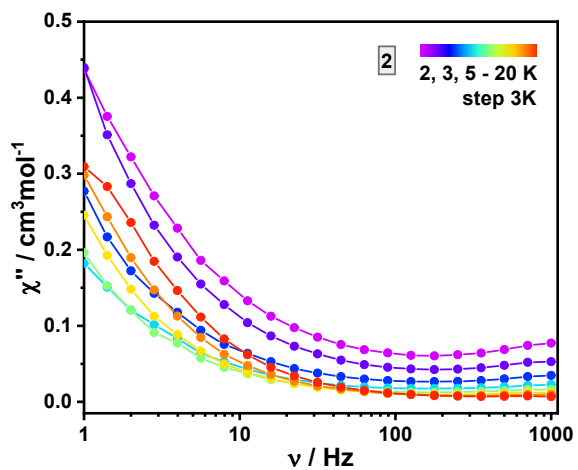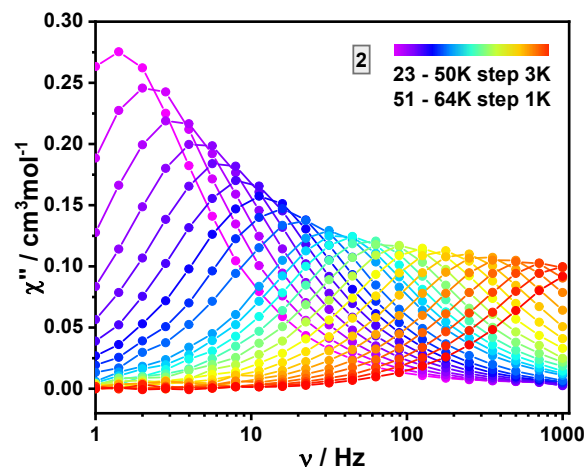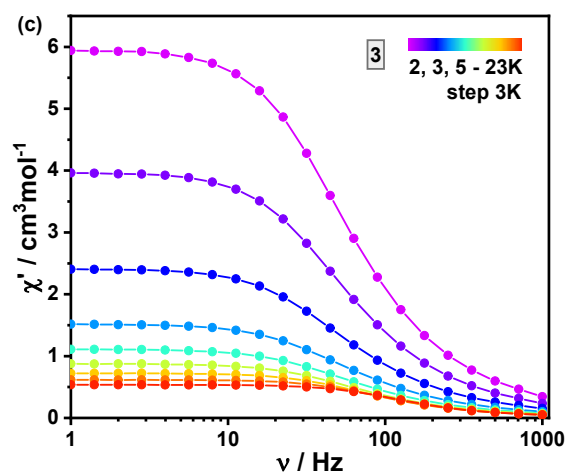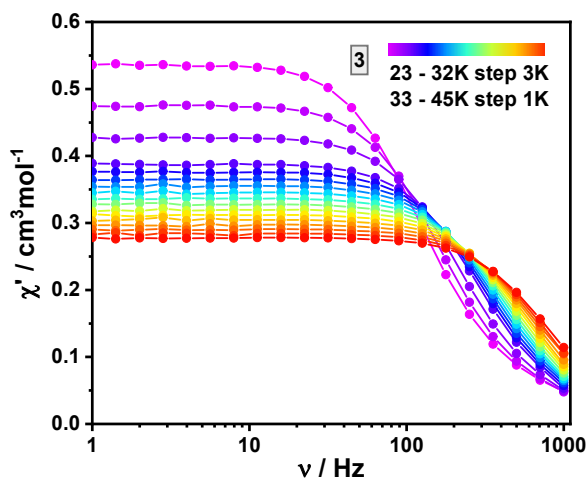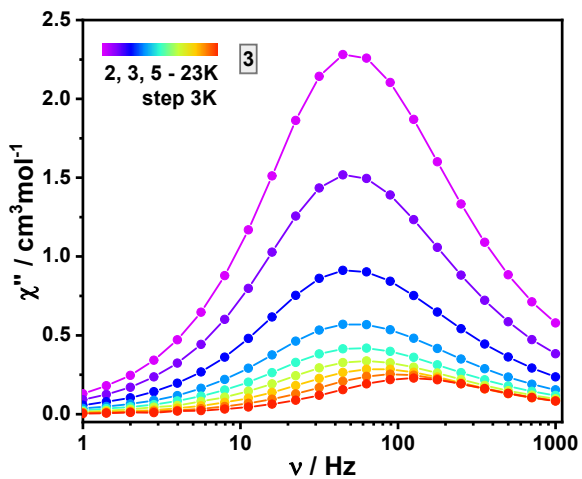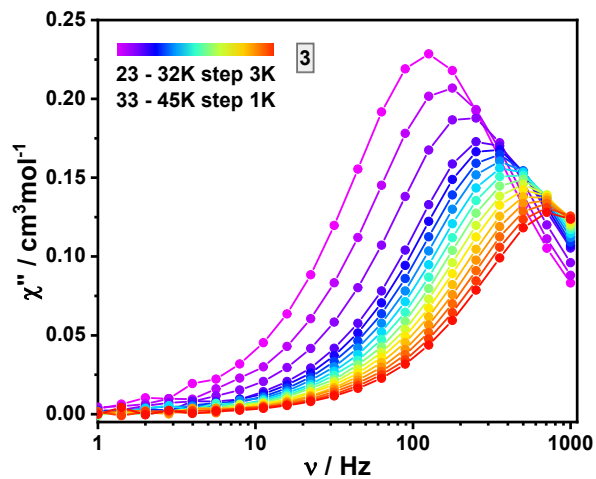



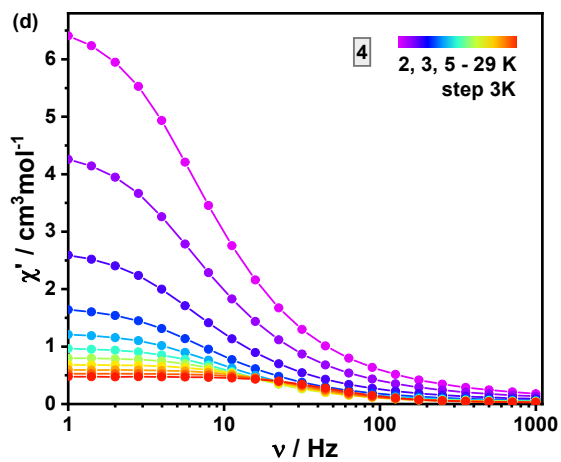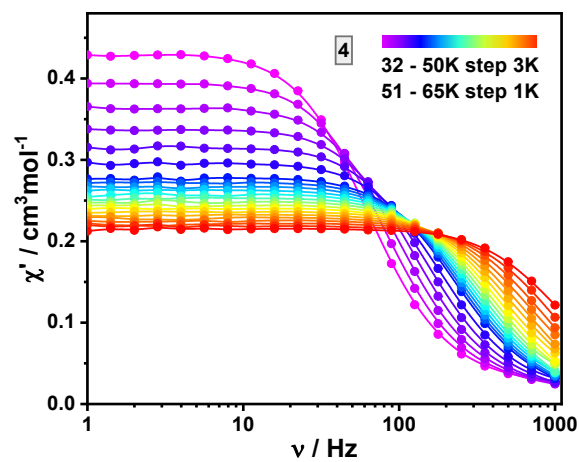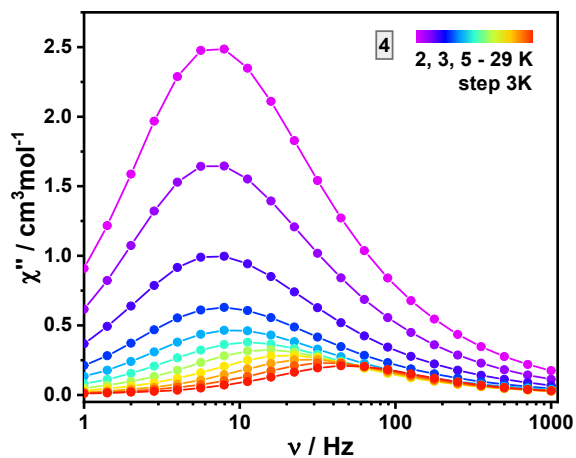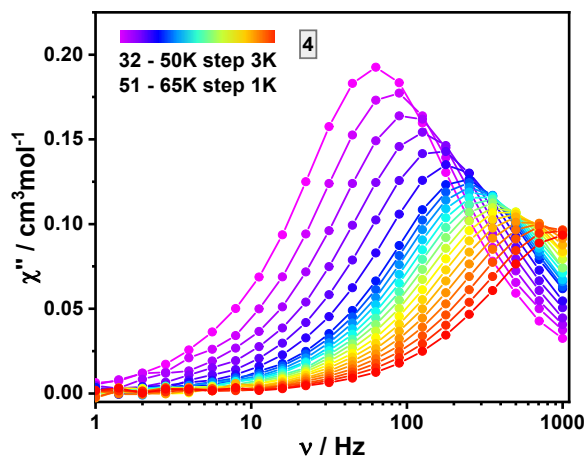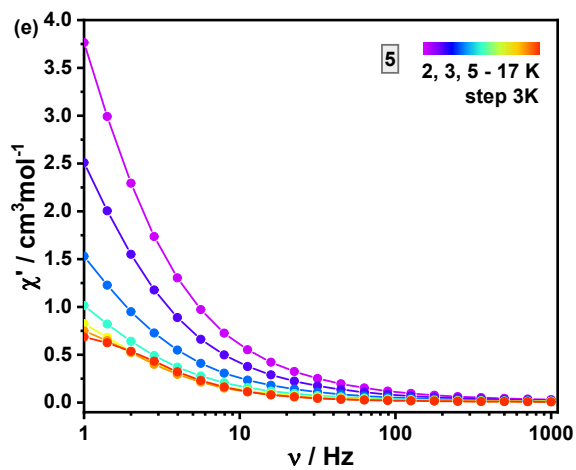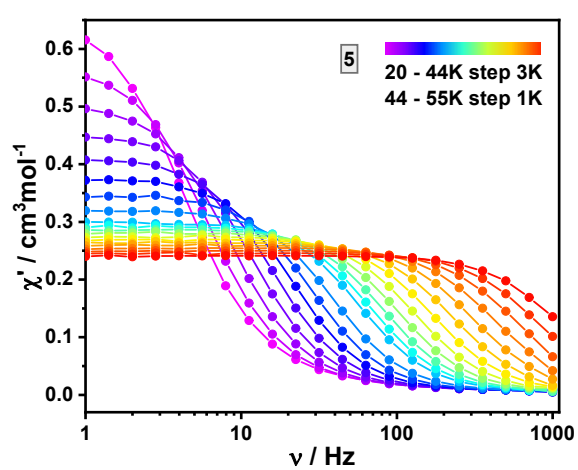

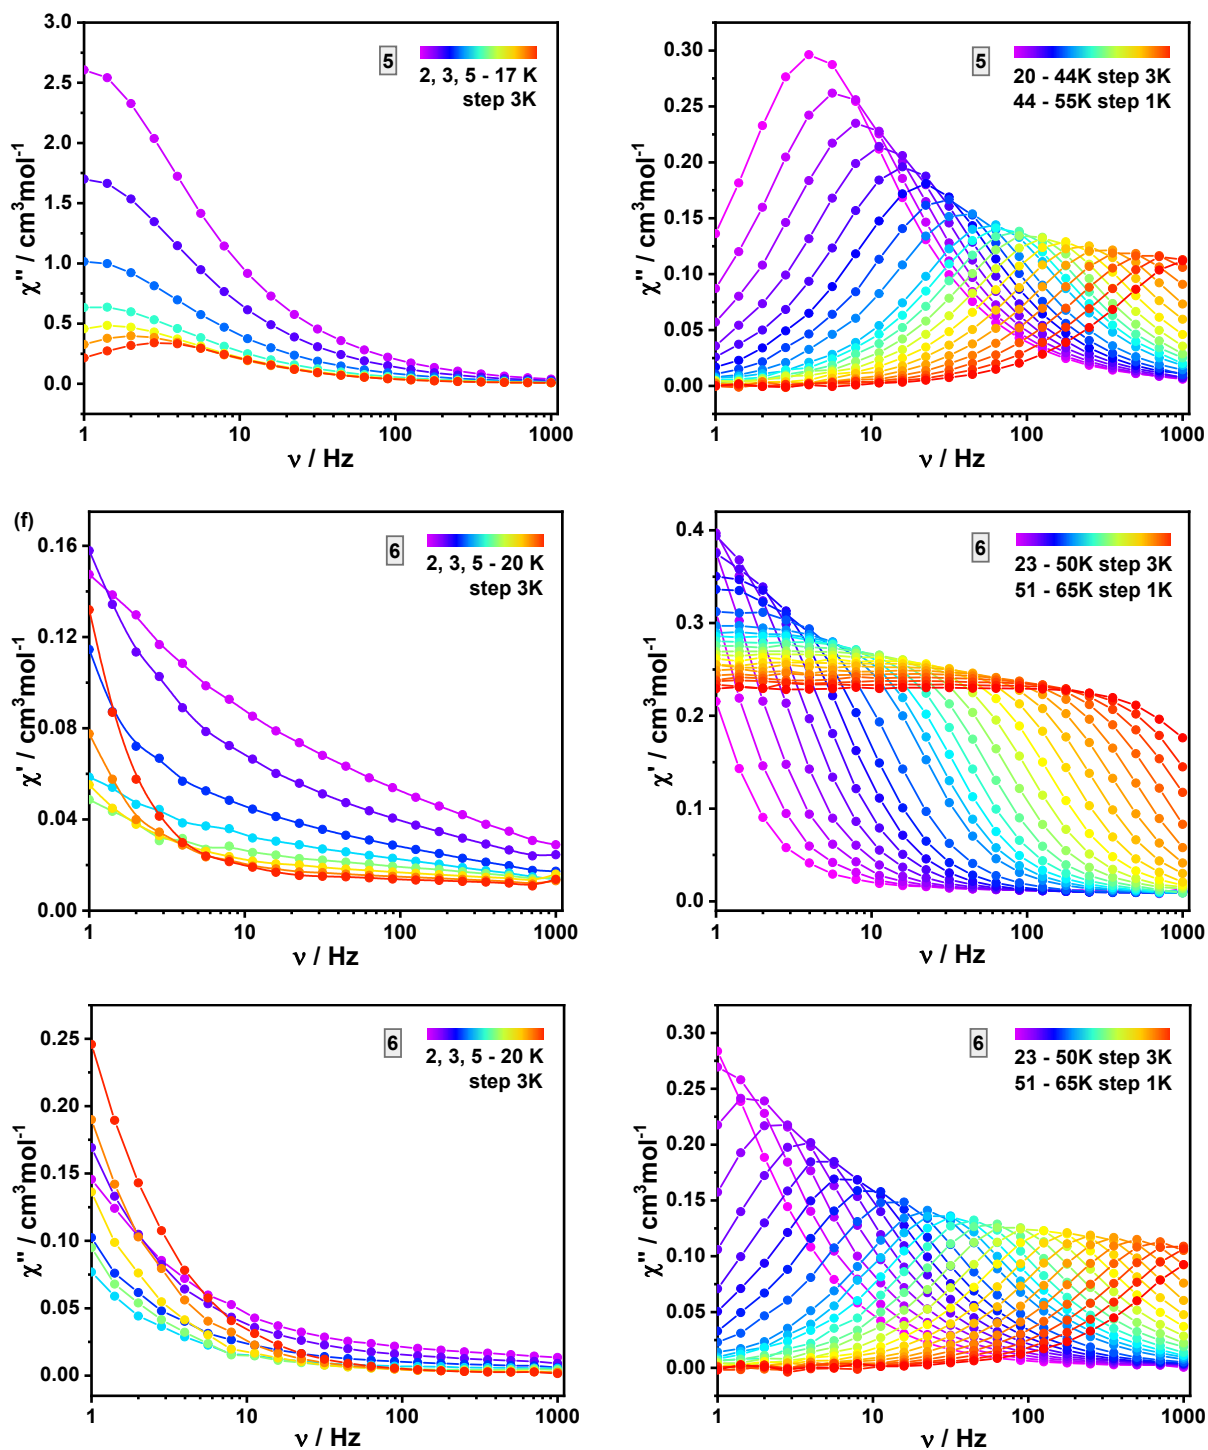

**Figure S9.** Frequency dependence of the in-phase ( $\chi'$ ) and out-of-phase ( $\chi''$ ) ac susceptibility of complexes 1–6 in zero dc field.

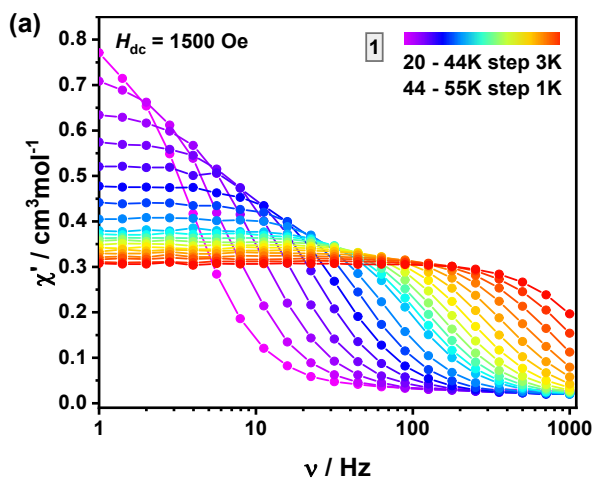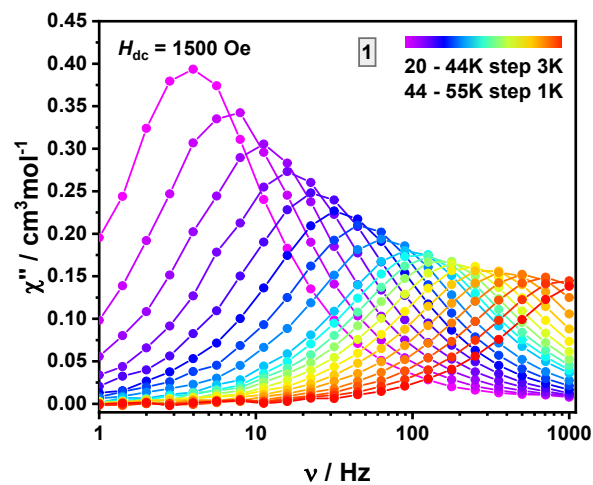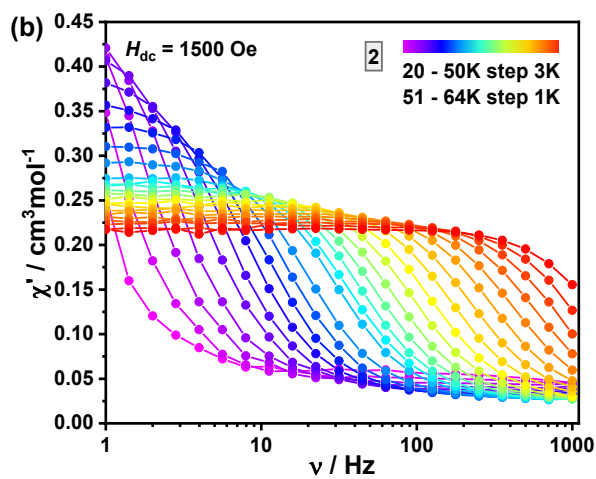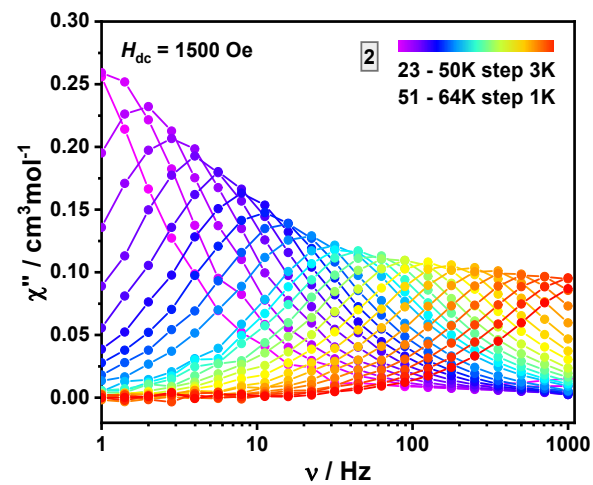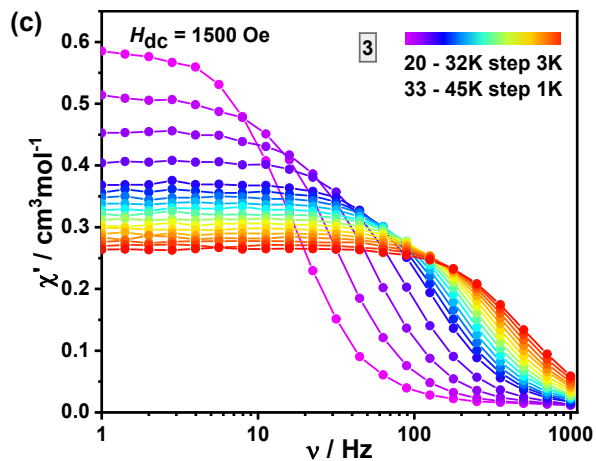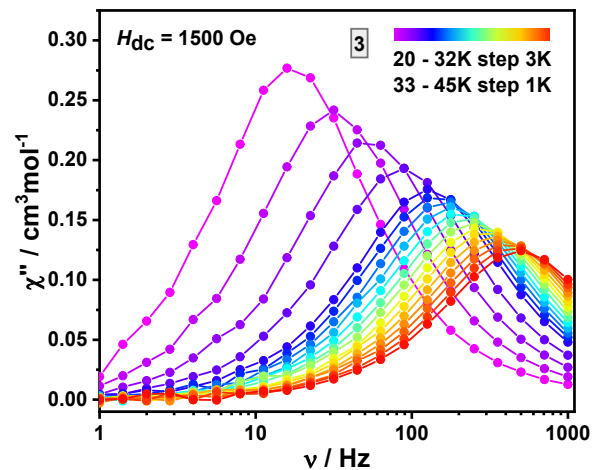

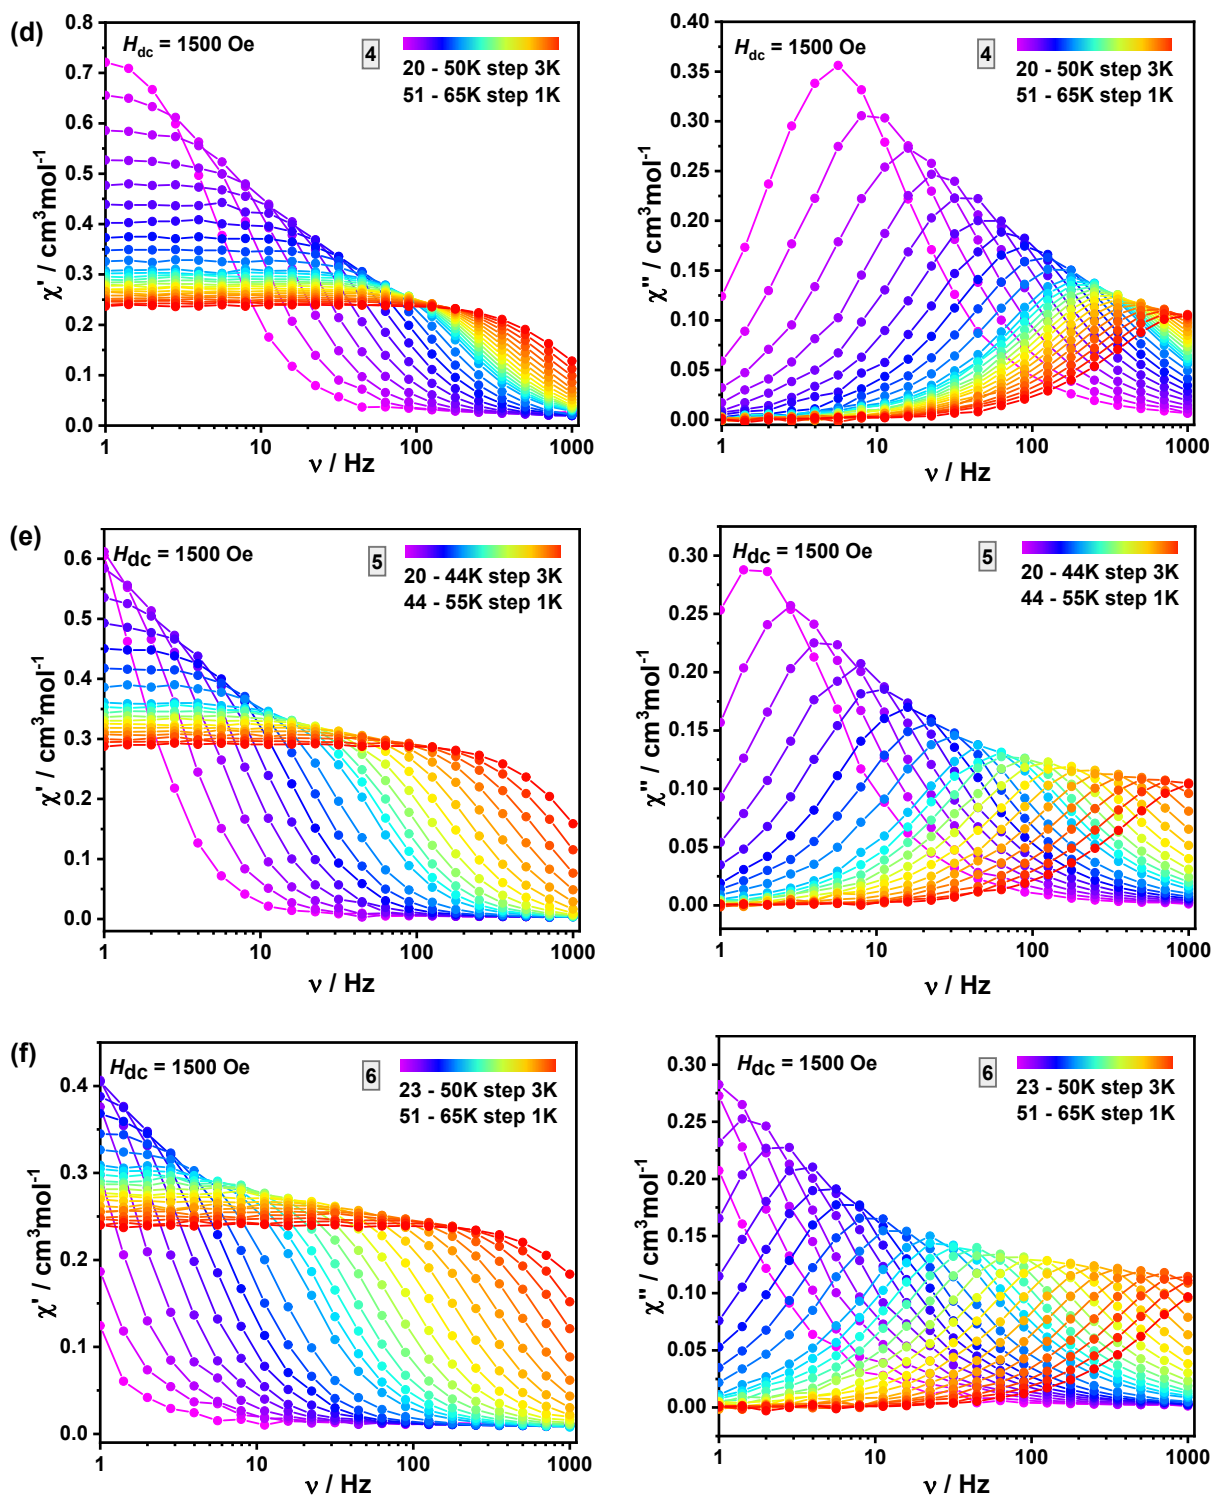

**Figure S10.** Frequency dependence of the in-phase ( $\chi'$ ) and out-of-phase ( $\chi''$ ) ac susceptibility of complexes 1–6 under 1500 Oe applied dc field.

## Fitting for the complexes

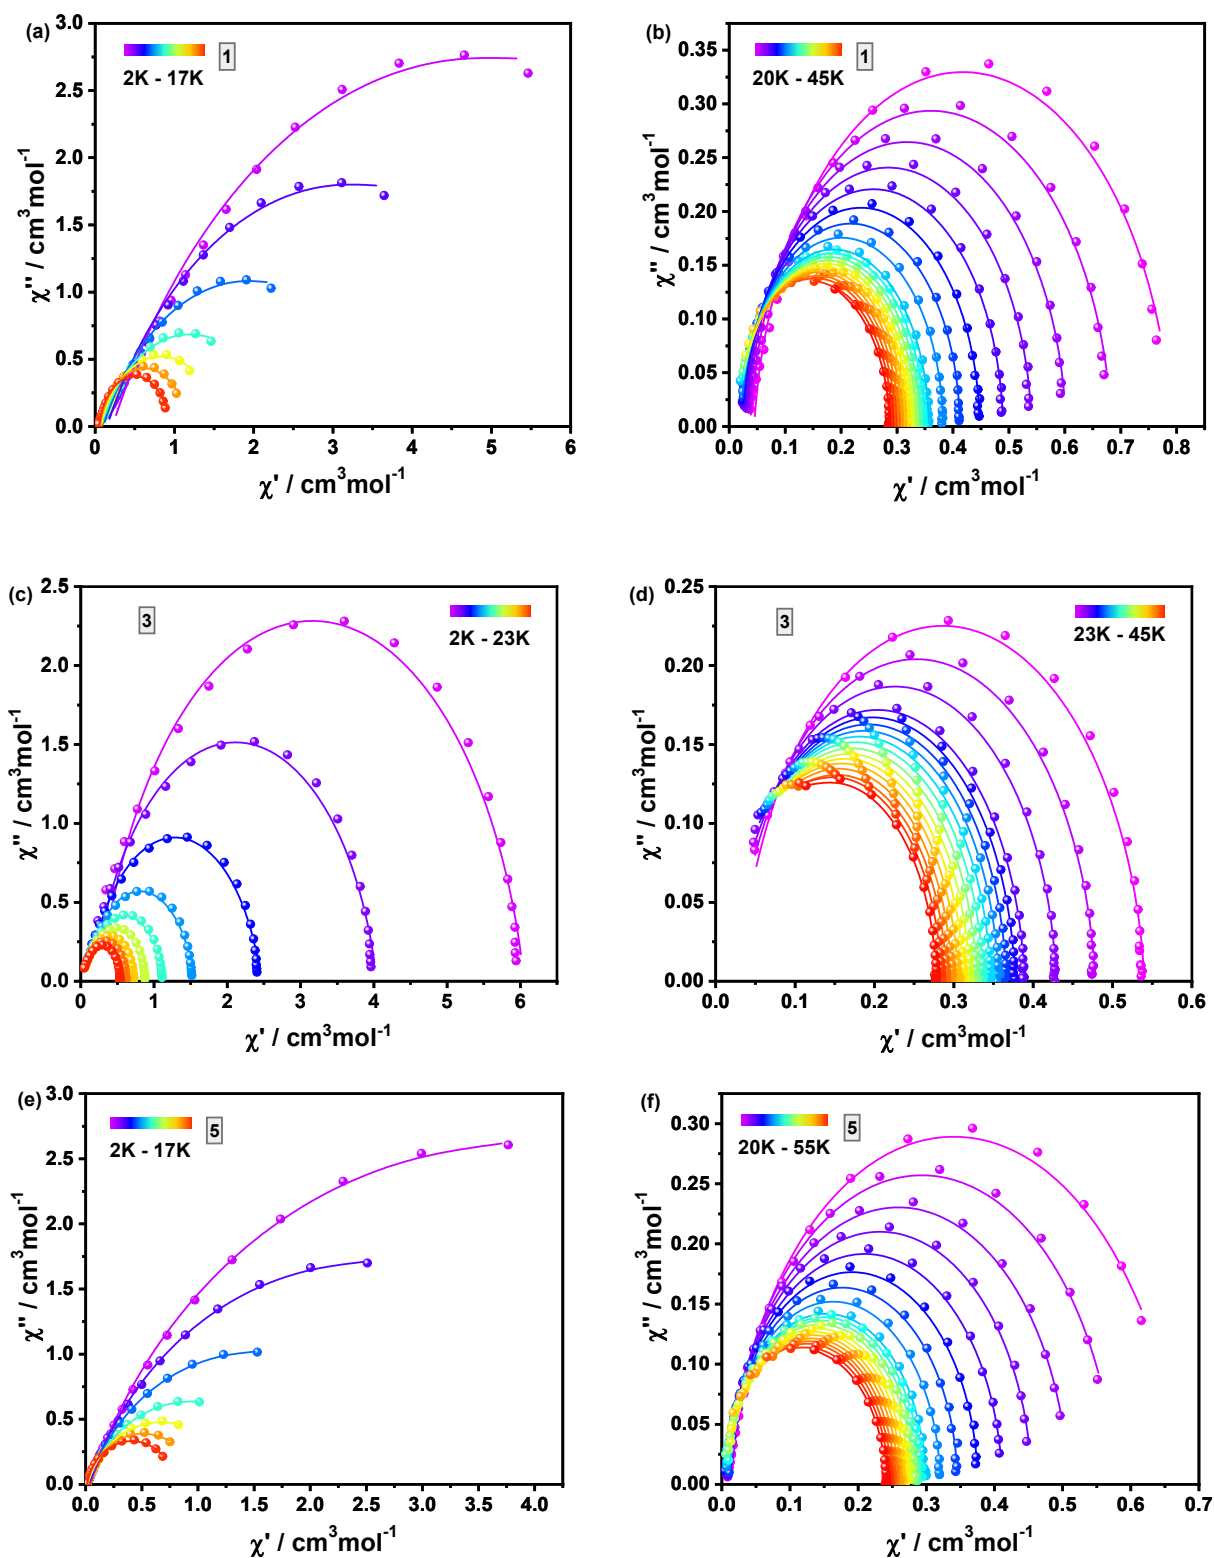

**Figure S11.** Cole-Cole plots for complexes 1, 3 and 5. The solid lines are the best fits for the generalized Debye model ( $0 < \alpha < 0.32$ ).

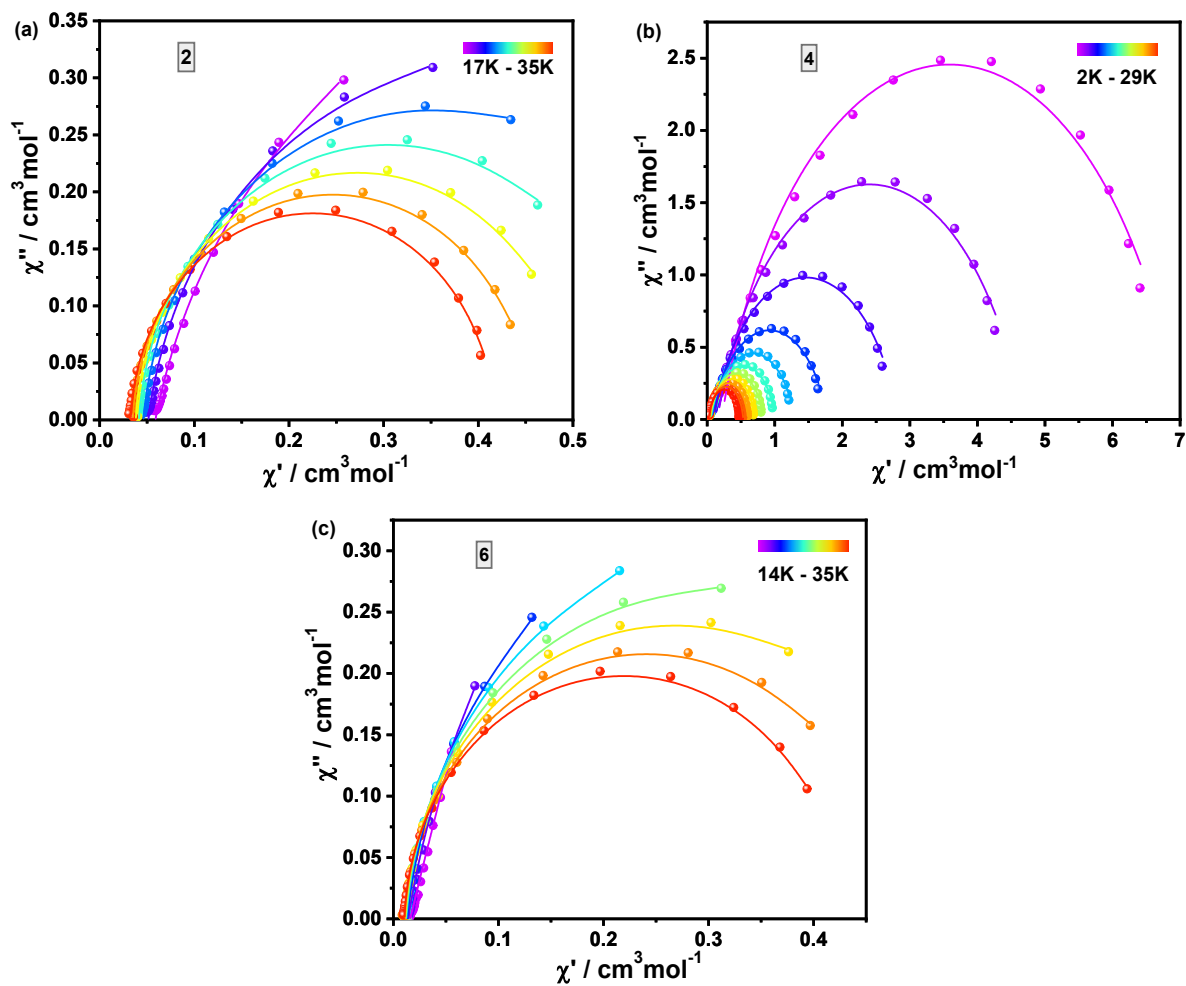

**Figure S12.** Cole-Cole plots of complexes **2**, **4** and **6** measured at low temperature (below 35 K). The solid lines are the best fits for the generalized Debye model ( $0 < \alpha < 0.19$ ).

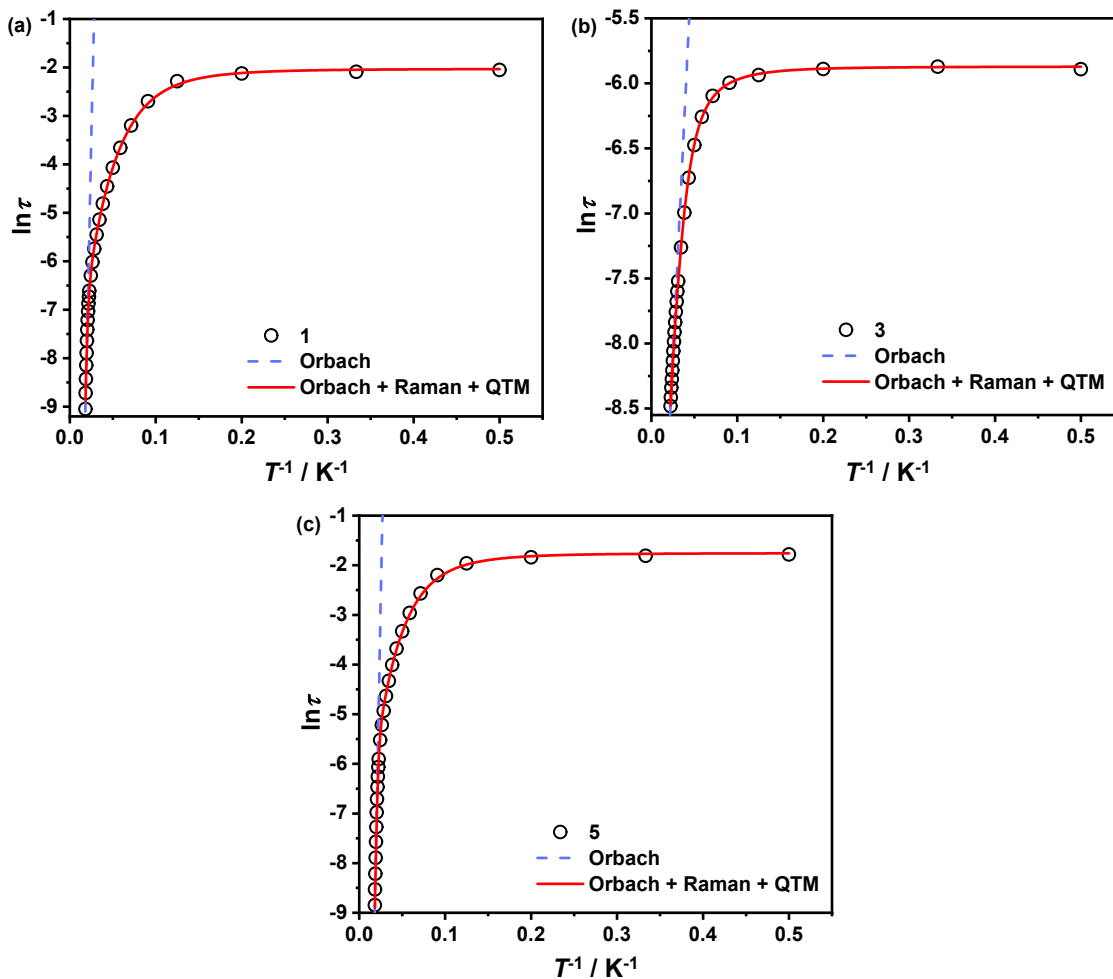

**Figure S13.** Temperature dependence of the magnetic relaxation time ( $\tau$ ) under zero dc field are shown as  $\ln(\tau)$  versus  $T^{-1}$  for **1**, **3**, and **5**. The blue dashed line and red solid line represent part of the Orbach process and the best fitting based on Arrhenius law, respectively.

## Magnetization hysteresis

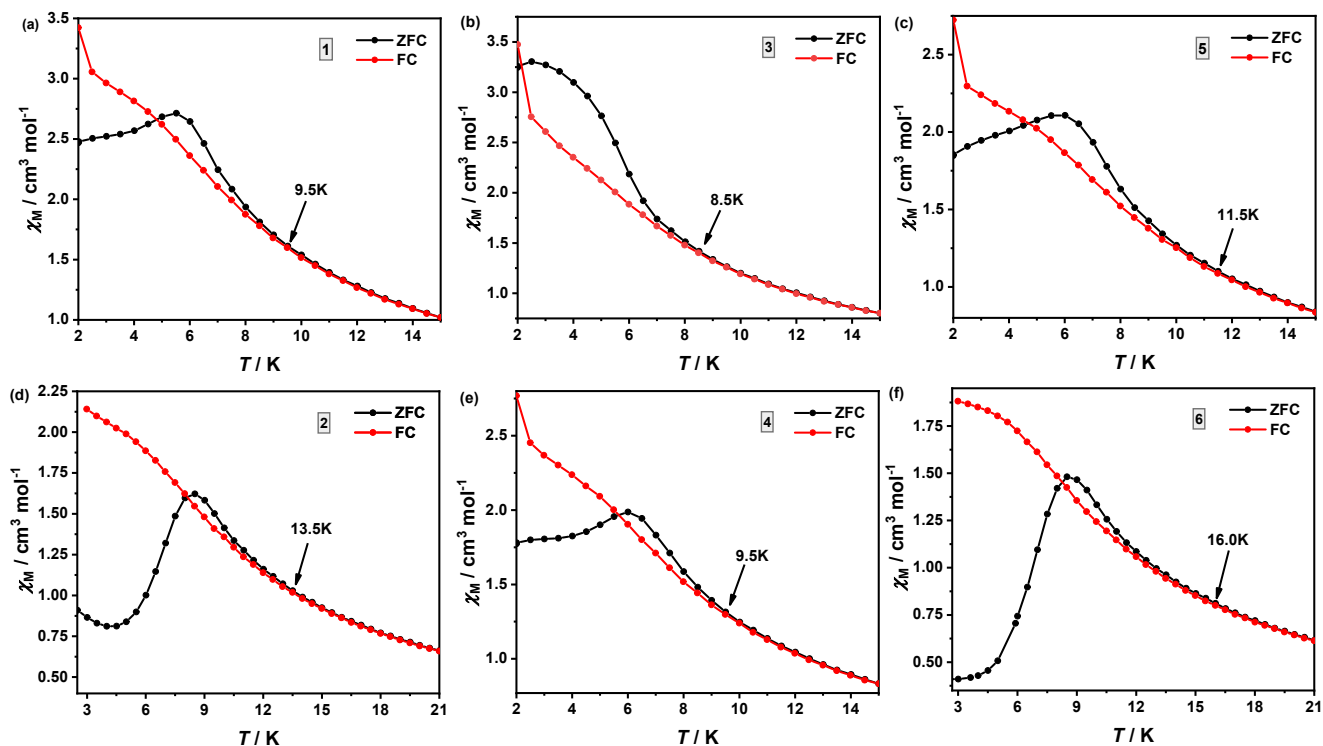

Figure S14. FC and ZFC measurements for 1–6 under 2 kOe applied dc field.

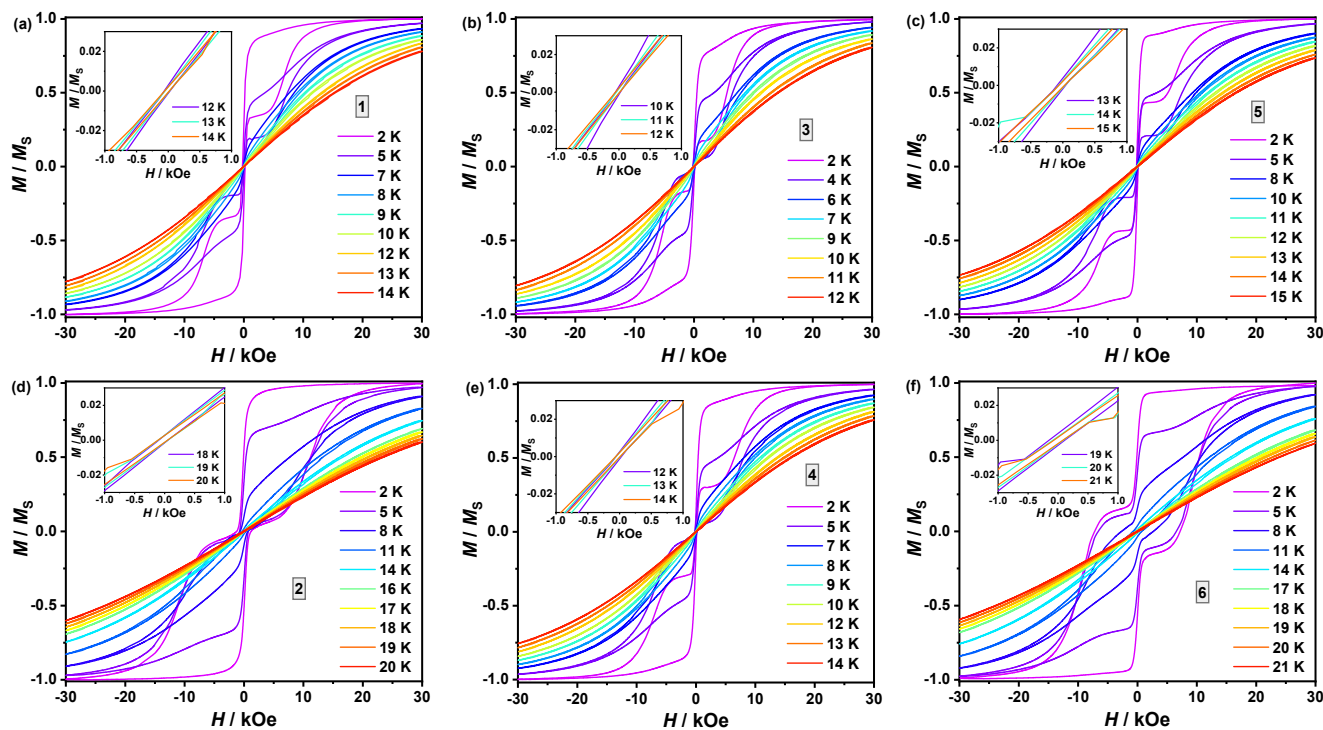

Figure S15. Magnetic hysteresis loops were measured at a sweep rate of  $0.02 \text{ T s}^{-1}$  of complexes 1–6.



## Fitting parameters

**Table S4.** Best fit parameters of the generalized Debye model at temperature ranging from 2 to 55 K under a 0 Oe DC field for **1**.

| T / K | $\chi_S / \text{cm}^3\text{mol}^{-1}\text{K}$ | $\chi_T / \text{cm}^3\text{mol}^{-1}\text{K}$ | $\tau / \text{s}$ | $\alpha$ |
|-------|-----------------------------------------------|-----------------------------------------------|-------------------|----------|
| 2     | 0.21573                                       | 9.51054                                       | 0.128640          | 0.31819  |
| 3     | 0.14973                                       | 6.23459                                       | 0.123530          | 0.31627  |
| 5     | 0.09934                                       | 3.75124                                       | 0.119610          | 0.31528  |
| 8     | 0.07411                                       | 2.30463                                       | 0.101900          | 0.29434  |
| 11    | 0.06661                                       | 1.58686                                       | 0.067400          | 0.22944  |
| 14    | 0.06019                                       | 1.18132                                       | 0.040840          | 0.15476  |
| 17    | 0.05233                                       | 0.94462                                       | 0.025780          | 0.10181  |
| 20    | 0.04476                                       | 0.79064                                       | 0.017070          | 0.06888  |
| 23    | 0.03762                                       | 0.6831                                        | 0.011630          | 0.04992  |
| 26    | 0.03322                                       | 0.60196                                       | 0.008140          | 0.035    |
| 29    | 0.02904                                       | 0.54026                                       | 0.005850          | 0.02676  |
| 32    | 0.02602                                       | 0.48948                                       | 0.004290          | 0.01963  |
| 35    | 0.02343                                       | 0.44781                                       | 0.003210          | 0.01514  |
| 38    | 0.02246                                       | 0.41218                                       | 0.002430          | 0.00871  |
| 41    | 0.02045                                       | 0.38206                                       | 0.001840          | 0.00672  |
| 44    | 0.01766                                       | 0.35667                                       | 0.001340          | 0.00657  |
| 45    | 0.01871                                       | 0.34844                                       | 0.001190          | 0.0028   |
| 46    | 0.01785                                       | 0.34132                                       | 0.001040          | 0.00433  |
| 47    | 0.01774                                       | 0.3342                                        | 0.000885          | 0.00357  |
| 48    | 0.01625                                       | 0.32741                                       | 0.000738          | 0.00506  |
| 49    | 0.01601                                       | 0.32091                                       | 0.000603          | 0.00439  |
| 50    | 0.01466                                       | 0.31453                                       | 0.000481          | 0.00518  |
| 51    | 0.0123                                        | 0.30875                                       | 0.000375          | 0.00873  |
| 52    | 0.01432                                       | 0.30275                                       | 0.000290          | 0.00584  |
| 53    | 0.01361                                       | 0.29709                                       | 0.000219          | 0.00616  |
| 54    | 0.01626                                       | 0.29174                                       | 0.000164          | 0.00704  |
| 55    | 0.0102                                        | 0.28666                                       | 0.000118          | 0.01408  |

**Table S5.** Best fit parameters of the generalized Debye model at temperature ranging from 17 to 64 K under a 0 Oe DC field for **2**.

| T / K | $\chi_S / \text{cm}^3\text{mol}^{-1}\text{K}$ | $\chi_T / \text{cm}^3\text{mol}^{-1}\text{K}$ | $\tau / \text{s}$ | $\alpha$   |
|-------|-----------------------------------------------|-----------------------------------------------|-------------------|------------|
| 17    | 0.0588584                                     | 1.05779                                       | 0.448384          | 0.145317   |
| 20    | 0.0513882                                     | 0.783125                                      | 0.203405          | 0.0921734  |
| 23    | 0.0461892                                     | 0.654362                                      | 0.116269          | 0.0623435  |
| 26    | 0.0414993                                     | 0.568407                                      | 0.0728741         | 0.0456349  |
| 29    | 0.0381685                                     | 0.505894                                      | 0.0488129         | 0.0376772  |
| 32    | 0.0350577                                     | 0.457169                                      | 0.0337935         | 0.0310743  |
| 35    | 0.032783                                      | 0.417399                                      | 0.0243553         | 0.026734   |
| 38    | 0.0305499                                     | 0.383597                                      | 0.0178845         | 0.0238394  |
| 41    | 0.0281754                                     | 0.354938                                      | 0.0133699         | 0.0240602  |
| 44    | 0.0276068                                     | 0.330133                                      | 0.010086          | 0.0182577  |
| 47    | 0.0260556                                     | 0.310496                                      | 0.00747244        | 0.023527   |
| 50    | 0.025213                                      | 0.290988                                      | 0.00495633        | 0.0210496  |
| 51    | 0.0251768                                     | 0.287005                                      | 0.00420339        | 0.0254486  |
| 52    | 0.0252969                                     | 0.280379                                      | 0.00344103        | 0.0201953  |
| 53    | 0.0255142                                     | 0.275296                                      | 0.00276712        | 0.0200261  |
| 54    | 0.0258332                                     | 0.271225                                      | 0.00217648        | 0.023181   |
| 55    | 0.0268594                                     | 0.265314                                      | 0.00167874        | 0.0138113  |
| 56    | 0.0259721                                     | 0.260015                                      | 0.00125498        | 0.0147009  |
| 57    | 0.0258266                                     | 0.256733                                      | 0.000941912       | 0.0166888  |
| 58    | 0.0263898                                     | 0.252126                                      | 0.000696406       | 0.0135946  |
| 59    | 0.0255876                                     | 0.247925                                      | 0.000513543       | 0.0142742  |
| 60    | 0.0260131                                     | 0.243281                                      | 0.000376531       | 0.00999408 |
| 61    | 0.0275882                                     | 0.23968                                       | 0.000279303       | 0.0108217  |
| 62    | 0.0283449                                     | 0.235847                                      | 0.000205959       | 0.00862397 |
| 63    | 0.0225348                                     | 0.232689                                      | 0.000146052       | 0.0235729  |
| 64    | 0.0229242                                     | 0.228224                                      | 0.000108188       | 0.0145579  |

**Table S6.** Best fit parameters of the generalized Debye model at temperature ranging from 2 to 45 K under a 0 Oe DC field for **3**.

| T / K | $\chi_S / \text{cm}^3\text{mol}^{-1}\text{K}$ | $\chi_T / \text{cm}^3\text{mol}^{-1}\text{K}$ | $\tau / \text{s}$ | $\alpha$ |
|-------|-----------------------------------------------|-----------------------------------------------|-------------------|----------|
| 2     | 0.27645                                       | 6.05126                                       | 0.002760          | 0.14098  |
| 3     | 0.18636                                       | 4.03826                                       | 0.002820          | 0.14501  |
| 5     | 0.11639                                       | 2.45356                                       | 0.002770          | 0.15025  |
| 8     | 0.07507                                       | 1.54392                                       | 0.002640          | 0.15333  |
| 11    | 0.05543                                       | 1.12978                                       | 0.002490          | 0.15239  |
| 14    | 0.04654                                       | 0.8897                                        | 0.002250          | 0.13819  |
| 17    | 0.04174                                       | 0.73228                                       | 0.001920          | 0.11373  |
| 20    | 0.03612                                       | 0.62249                                       | 0.001540          | 0.09004  |
| 23    | 0.03232                                       | 0.54033                                       | 0.001200          | 0.06698  |
| 26    | 0.02751                                       | 0.47783                                       | 0.000917          | 0.05252  |
| 29    | 0.02288                                       | 0.42891                                       | 0.000702          | 0.04272  |
| 32    | 0.01856                                       | 0.3888                                        | 0.000542          | 0.03643  |
| 33    | 0.019                                         | 0.37699                                       | 0.000500          | 0.03271  |
| 34    | 0.01888                                       | 0.36591                                       | 0.000462          | 0.02993  |
| 35    | 0.01779                                       | 0.35591                                       | 0.000427          | 0.02951  |
| 36    | 0.0165                                        | 0.34615                                       | 0.000395          | 0.02823  |
| 37    | 0.01555                                       | 0.33689                                       | 0.000366          | 0.02657  |
| 38    | 0.01542                                       | 0.32838                                       | 0.000340          | 0.02626  |
| 39    | 0.0153                                        | 0.3197                                        | 0.000316          | 0.02367  |
| 40    | 0.01371                                       | 0.31219                                       | 0.000294          | 0.02554  |
| 41    | 0.01207                                       | 0.30515                                       | 0.000273          | 0.0275   |
| 42    | 0.01344                                       | 0.29718                                       | 0.000255          | 0.02199  |
| 43    | 0.01522                                       | 0.29054                                       | 0.000239          | 0.02092  |
| 44    | 0.01236                                       | 0.28399                                       | 0.000222          | 0.02019  |
| 45    | 0.01348                                       | 0.27788                                       | 0.000207          | 0.02031  |

**Table S7.** Best fit parameters of the generalized Debye model at temperature ranging from 2 to 65 K under a 0 Oe DC field for **4**.

| T / K | $\chi_S / \text{cm}^3\text{mol}^{-1}\text{K}$ | $\chi_T / \text{cm}^3\text{mol}^{-1}\text{K}$ | $\tau / \text{s}$ | $\alpha$ |
|-------|-----------------------------------------------|-----------------------------------------------|-------------------|----------|
| 2     | 0.21447                                       | 6.9676                                        | 0.020540          | 0.19331  |
| 3     | 0.15271                                       | 4.64842                                       | 0.020910          | 0.19667  |
| 5     | 0.09829                                       | 2.82291                                       | 0.020370          | 0.19889  |
| 8     | 0.06771                                       | 1.77403                                       | 0.018180          | 0.19722  |
| 11    | 0.05681                                       | 1.29042                                       | 0.015440          | 0.18204  |
| 14    | 0.05101                                       | 1.00874                                       | 0.012400          | 0.15301  |
| 17    | 0.04483                                       | 0.82494                                       | 0.009520          | 0.1208   |
| 20    | 0.03947                                       | 0.69822                                       | 0.007200          | 0.09419  |
| 23    | 0.03625                                       | 0.6031                                        | 0.005400          | 0.06812  |
| 26    | 0.03088                                       | 0.53339                                       | 0.004080          | 0.05556  |
| 29    | 0.02829                                       | 0.47796                                       | 0.003120          | 0.04293  |
| 32    | 0.02628                                       | 0.43197                                       | 0.002420          | 0.03275  |
| 35    | 0.02255                                       | 0.39611                                       | 0.001900          | 0.03138  |
| 38    | 0.02126                                       | 0.36525                                       | 0.001520          | 0.02598  |
| 41    | 0.02001                                       | 0.33831                                       | 0.001230          | 0.02129  |
| 44    | 0.01825                                       | 0.31582                                       | 0.001000          | 0.02064  |
| 47    | 0.01848                                       | 0.29621                                       | 0.000830          | 0.01797  |
| 50    | 0.01656                                       | 0.27779                                       | 0.000677          | 0.01752  |
| 51    | 0.01653                                       | 0.2727                                        | 0.000635          | 0.01763  |
| 52    | 0.0164                                        | 0.26744                                       | 0.000592          | 0.01701  |
| 53    | 0.01713                                       | 0.26313                                       | 0.000556          | 0.01796  |
| 54    | 0.01551                                       | 0.25765                                       | 0.000513          | 0.01729  |
| 55    | 0.0151                                        | 0.25296                                       | 0.000475          | 0.01685  |
| 56    | 0.01798                                       | 0.24872                                       | 0.000444          | 0.01366  |
| 57    | 0.01561                                       | 0.24443                                       | 0.000404          | 0.01832  |
| 58    | 0.01532                                       | 0.24051                                       | 0.000368          | 0.01982  |
| 59    | 0.01859                                       | 0.23649                                       | 0.000339          | 0.01661  |
| 60    | 0.01817                                       | 0.23247                                       | 0.000304          | 0.01722  |
| 61    | 0.01782                                       | 0.22871                                       | 0.000272          | 0.01564  |
| 62    | 0.01802                                       | 0.22514                                       | 0.000239          | 0.01834  |
| 63    | 0.01779                                       | 0.22127                                       | 0.000209          | 0.01467  |
| 64    | 0.01812                                       | 0.21886                                       | 0.000181          | 0.02334  |
| 65    | 0.01951                                       | 0.21534                                       | 0.000155          | 0.02441  |

**Table S8.** Best fit parameters of the generalized Debye model at temperature ranging from 2 to 55 K under a 0 Oe DC field for **5**.

| T / K | $\chi_S / \text{cm}^3\text{mol}^{-1}\text{K}$ | $\chi_T / \text{cm}^3\text{mol}^{-1}\text{K}$ | $\tau / \text{s}$ | $\alpha$ |
|-------|-----------------------------------------------|-----------------------------------------------|-------------------|----------|
| 2     | 0.03678                                       | 7.61596                                       | 0.168200          | 0.22986  |
| 3     | 0.0262                                        | 5.00147                                       | 0.163780          | 0.23383  |
| 5     | 0.01826                                       | 2.99042                                       | 0.158570          | 0.2347   |
| 8     | 0.0147                                        | 1.85555                                       | 0.140680          | 0.22628  |
| 11    | 0.01419                                       | 1.32824                                       | 0.110970          | 0.19559  |
| 14    | 0.01402                                       | 1.00677                                       | 0.076560          | 0.14669  |
| 17    | 0.01323                                       | 0.80335                                       | 0.051780          | 0.10215  |
| 20    | 0.01226                                       | 0.66811                                       | 0.035770          | 0.07025  |
| 23    | 0.01072                                       | 0.57593                                       | 0.025280          | 0.04967  |
| 26    | 0.00926                                       | 0.50836                                       | 0.018170          | 0.04013  |
| 29    | 0.00886                                       | 0.45478                                       | 0.013170          | 0.02655  |
| 32    | 0.00821                                       | 0.41132                                       | 0.009730          | 0.02068  |
| 35    | 0.00686                                       | 0.3757                                        | 0.007220          | 0.01627  |
| 38    | 0.00757                                       | 0.34579                                       | 0.005430          | 0.00919  |
| 41    | 0.00666                                       | 0.32039                                       | 0.004000          | 0.00843  |
| 44    | 0.00643                                       | 0.29928                                       | 0.002720          | 0.00811  |
| 45    | 0.0063                                        | 0.29289                                       | 0.002320          | 0.00768  |
| 46    | 0.00516                                       | 0.28714                                       | 0.001920          | 0.01014  |
| 47    | 0.00602                                       | 0.28137                                       | 0.001550          | 0.01017  |
| 48    | 0.00595                                       | 0.27514                                       | 0.001220          | 0.01243  |
| 49    | 0.00521                                       | 0.26954                                       | 0.000931          | 0.01545  |
| 50    | 0.00296                                       | 0.26464                                       | 0.000694          | 0.02247  |
| 51    | 0.00371                                       | 0.25979                                       | 0.000515          | 0.02302  |
| 52    | 0.00246                                       | 0.2546                                        | 0.000374          | 0.02564  |
| 53    | 0.00162                                       | 0.24988                                       | 0.000271          | 0.02645  |
| 54    | 0.00359                                       | 0.24565                                       | 0.000198          | 0.02929  |
| 55    | 0.00555                                       | 0.24129                                       | 0.000144          | 0.02912  |

**Table S9.** Best fit parameters of the generalized Debye model at temperature ranging from 17 to 65 K under a 0 Oe DC field for **6**.

| T / K | $\chi_S / \text{cm}^3\text{mol}^{-1}\text{K}$ | $\chi_T / \text{cm}^3\text{mol}^{-1}\text{K}$ | $\tau / \text{s}$ | $\alpha$               |
|-------|-----------------------------------------------|-----------------------------------------------|-------------------|------------------------|
| 17    | 0.01416                                       | 1.37147                                       | 1.340440          | 0.11442                |
| 20    | 0.01323                                       | 0.82233                                       | 0.464970          | 0.07125                |
| 23    | 0.01226                                       | 0.69349                                       | 0.261810          | 0.05616                |
| 26    | 0.01182                                       | 0.59005                                       | 0.154530          | 0.04323                |
| 29    | 0.01117                                       | 0.52463                                       | 0.098120          | 0.03449                |
| 32    | 0.01076                                       | 0.47171                                       | 0.065260          | 0.03135                |
| 35    | 0.01058                                       | 0.428                                         | 0.044520          | 0.0227                 |
| 38    | 0.01051                                       | 0.39213                                       | 0.031590          | 0.01778                |
| 41    | 0.00987                                       | 0.36375                                       | 0.022880          | 0.02032                |
| 44    | 0.00983                                       | 0.34093                                       | 0.016660          | 0.0211                 |
| 47    | 0.00988                                       | 0.31757                                       | 0.011540          | 0.01773                |
| 50    | 0.0105                                        | 0.29833                                       | 0.007160          | 0.01633                |
| 51    | 0.01058                                       | 0.29159                                       | 0.005830          | 0.01489                |
| 52    | 0.01094                                       | 0.28702                                       | 0.004670          | 0.01735                |
| 53    | 0.01156                                       | 0.28074                                       | 0.003620          | 0.0111                 |
| 54    | 0.01103                                       | 0.27597                                       | 0.002760          | 0.01414                |
| 55    | 0.01227                                       | 0.27063                                       | 0.002080          | 0.01011                |
| 56    | 0.01241                                       | 0.26624                                       | 0.001540          | 0.00888                |
| 57    | 0.0124                                        | 0.26116                                       | 0.001130          | 0.00743                |
| 58    | 0.01239                                       | 0.25695                                       | 0.000825          | 0.00589                |
| 59    | 0.01278                                       | 0.25333                                       | 0.000605          | 0.0071                 |
| 60    | 0.01311                                       | 0.2486                                        | 0.000441          | 0.00389                |
| 61    | 0.01257                                       | 0.24468                                       | 0.000323          | 0.00354                |
| 62    | 0.01326                                       | 0.24044                                       | 0.000237          | 0.00113                |
| 63    | 0.01388                                       | 0.23718                                       | 0.000174          | 0.0074                 |
| 64    | 0.01564                                       | 0.23328                                       | 0.000131          | $4.31 \times 10^{-14}$ |
| 65    | 0.01598                                       | 0.22984                                       | 0.000096          | $6.61 \times 10^{-14}$ |

## Theoretical analysis

**Table S10.** Decomposition of the wavefunctions of lowest-lying KDs in terms of the components of the ground  ${}^6H_{15/2}$  multiplet of  $Dy^{III}$ , the key diagonal crystal field parameter (CFP)  $B(2,0)$  and non-diagonal CFP  $B(2,2)$ .

|          | $KD_0$                      | $KD_1$                      | $KD_2$                      | $B(2,0)$ | $B(2,2)$ | ESP ratio |
|----------|-----------------------------|-----------------------------|-----------------------------|----------|----------|-----------|
| <b>1</b> | $ \pm 15/2\rangle$ , 99.90% | $ \pm 13/2\rangle$ , 98.54% | $ \pm 11/2\rangle$ , 78.32% | -4.340   | 1.187    | 1.180     |
| <b>2</b> | $ \pm 15/2\rangle$ , 99.94% | $ \pm 13/2\rangle$ , 99.34% | $ \pm 11/2\rangle$ , 93.93% | -4.962   | 0.533    | 1.261     |
| <b>3</b> | $ \pm 15/2\rangle$ , 99.54% | $ \pm 13/2\rangle$ , 97.98% | $ \pm 11/2\rangle$ , 86.27% | -5.308   | 0.960    | 1.153     |
| <b>4</b> | $ \pm 15/2\rangle$ , 99.62% | $ \pm 13/2\rangle$ , 98.49% | $ \pm 11/2\rangle$ , 92.81% | -5.654   | 0.352    | 1.205     |
| <b>5</b> | $ \pm 15/2\rangle$ , 99.91% | $ \pm 13/2\rangle$ , 98.91% | $ \pm 11/2\rangle$ , 80.07% | -4.361   | 1.391    | 1.196     |
| <b>6</b> | $ \pm 15/2\rangle$ , 99.94% | $ \pm 13/2\rangle$ , 99.46% | $ \pm 11/2\rangle$ , 94.15% | -4.819   | 0.803    | 1.262     |

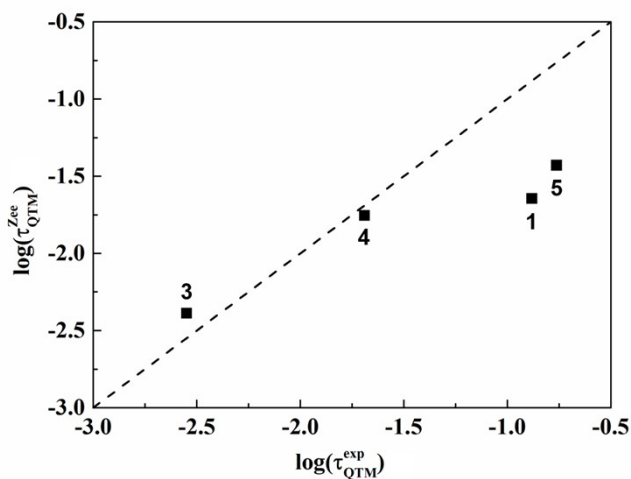

**Figure S16** Direct comparison between experimental and theoretical  $\tau_{QTM}$  of **1** and **3 – 5**.

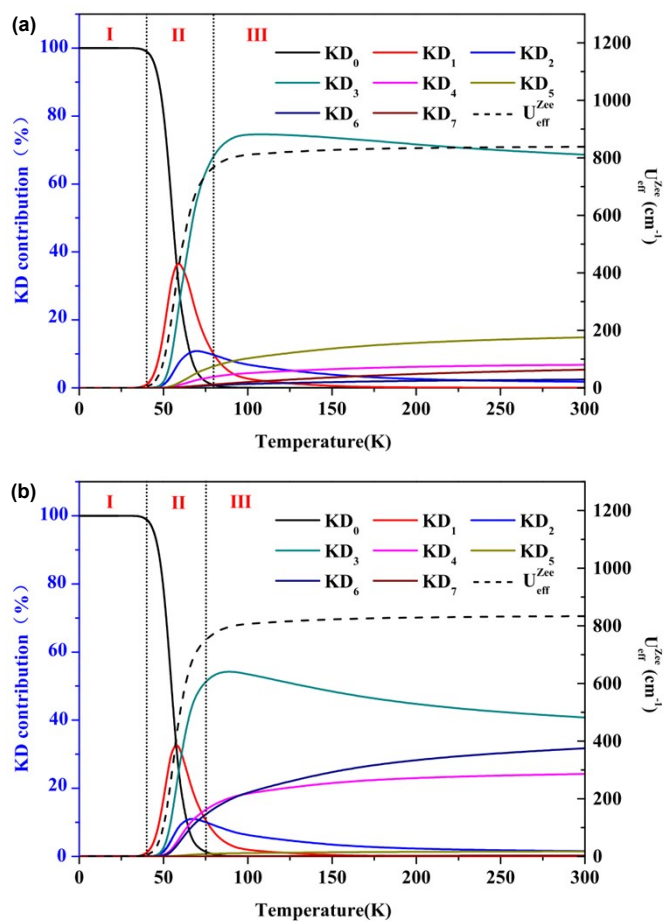

Figure S17 Quantitative results of  $U_{eff}^{Zee}$  within the framework of TA-QTM of 2 (a) and 6 (b).



# The $^1\text{H}$ NMR and $^{13}\text{C}$ spectra of n-OMe- $\text{H}_2\text{bbpen}$

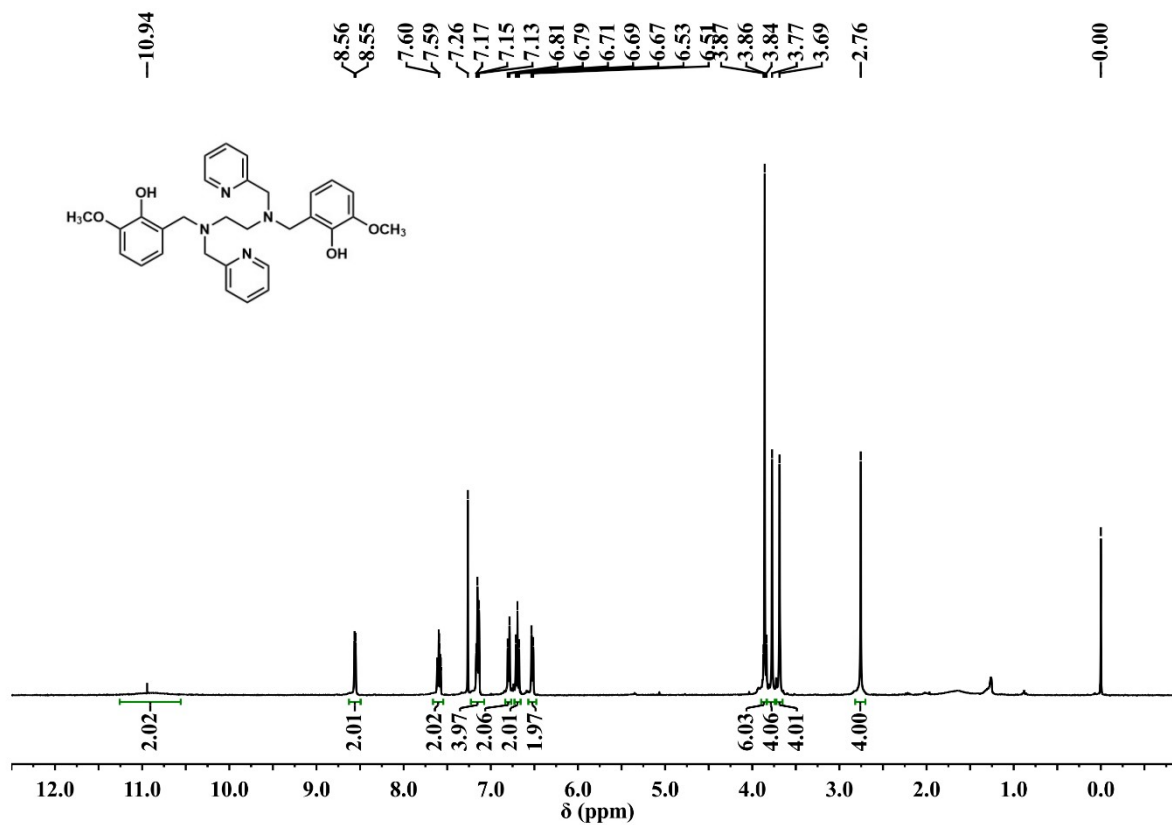

Figure S18  $^1\text{H}$  NMR spectra of 3-OMe- $\text{H}_2\text{bbpen}$  in  $\text{CDCl}_3$  at room temperature.

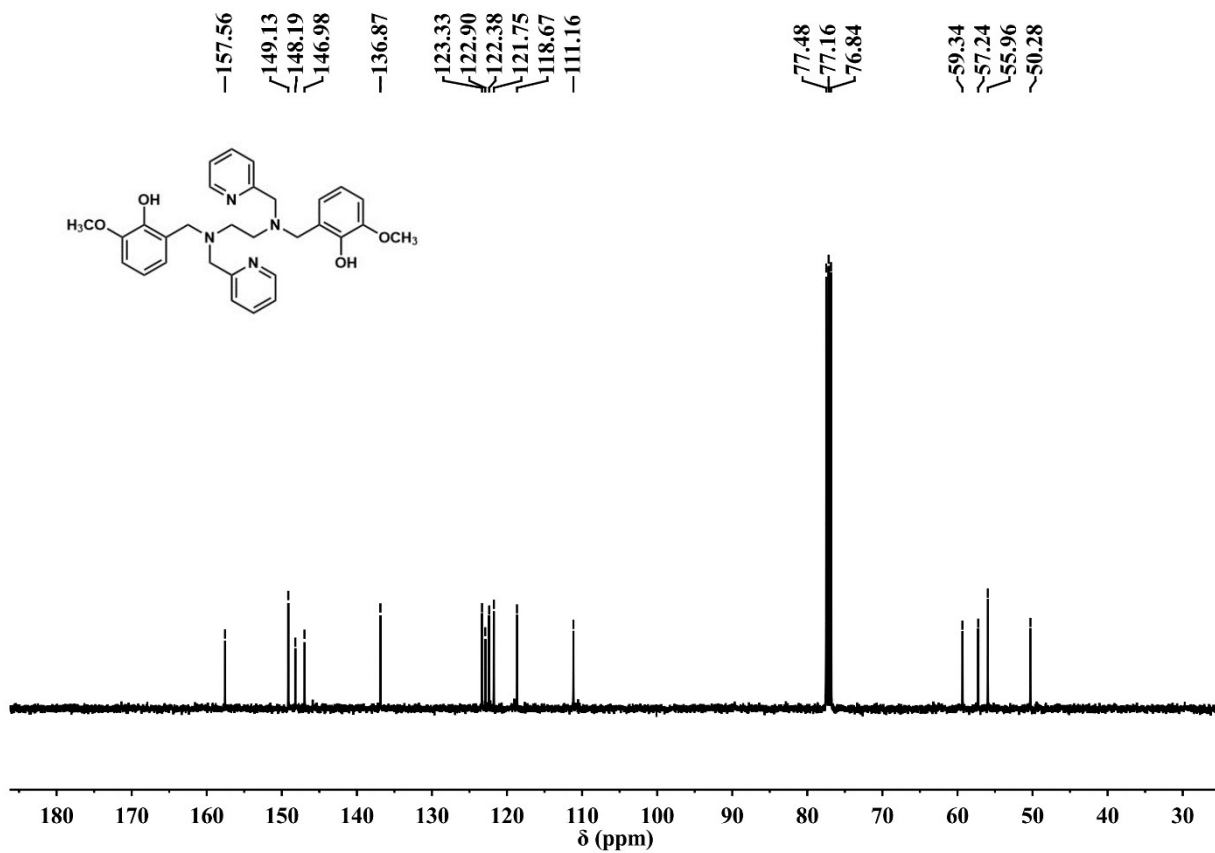

**Figure S19** <sup>13</sup>C NMR spectra of **3-OMe-H<sub>2</sub>bbpen** in CDCl<sub>3</sub> at room temperature.

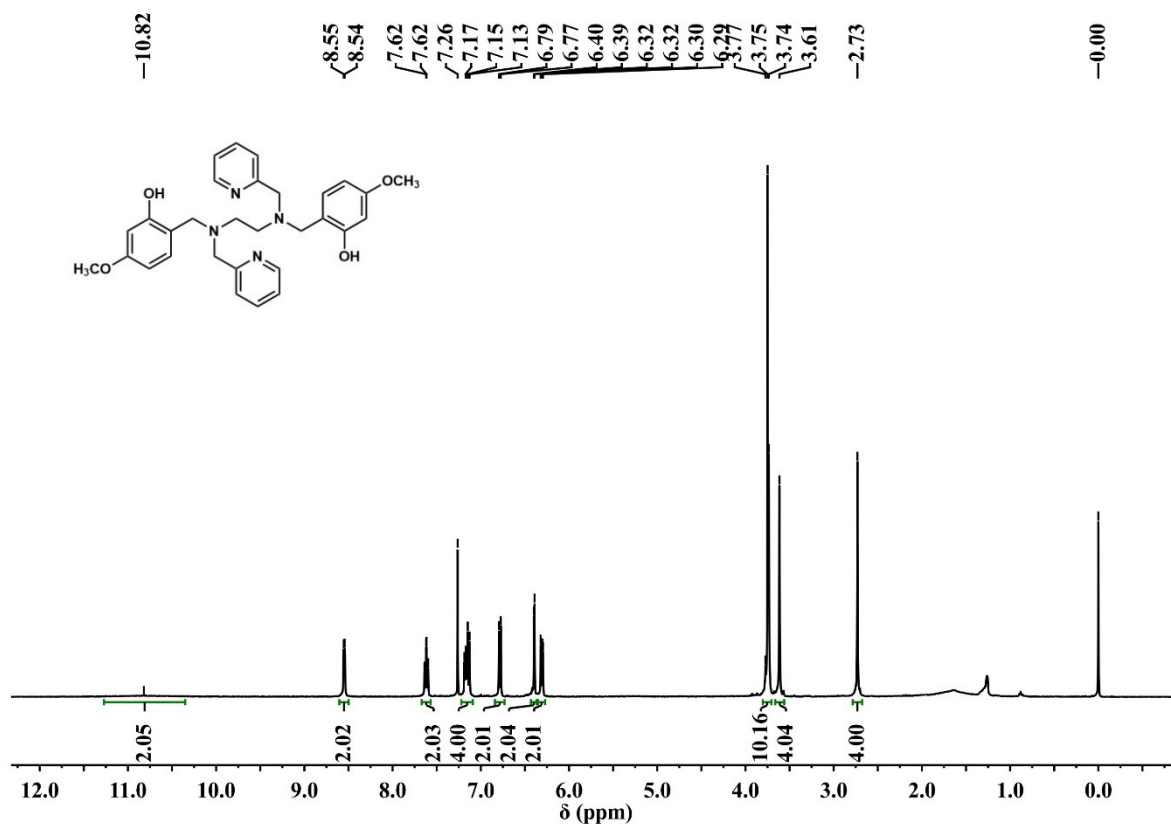

Figure S20 <sup>1</sup>H NMR spectra of 4-OMe-H<sub>2</sub>bbpen in CDCl<sub>3</sub> at room temperature.

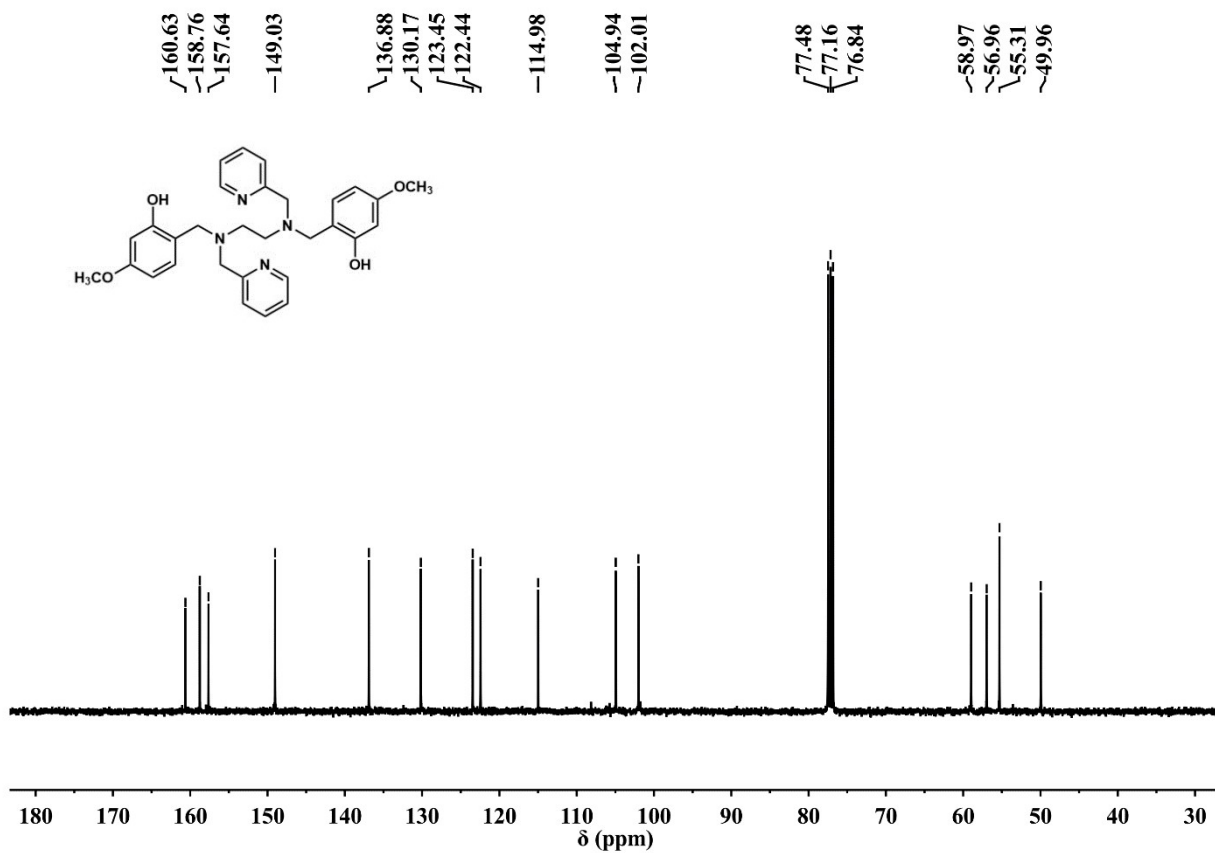

**Figure S21** <sup>13</sup>C NMR spectra of 4-OMe-H<sub>2</sub>bbpen in CDCl<sub>3</sub> at room temperature.

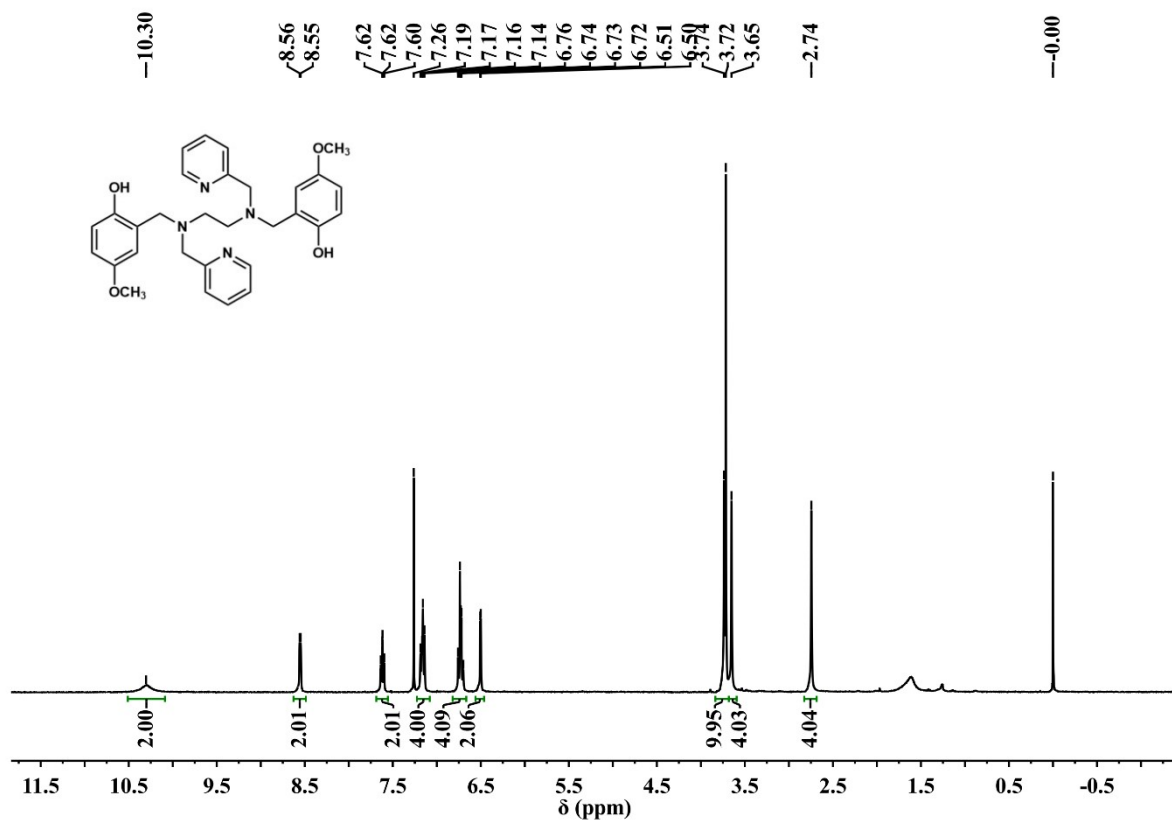

**Figure S22** <sup>1</sup>H NMR spectra of 5-OMe-H<sub>2</sub>bbpen in CDCl<sub>3</sub> at room temperature.

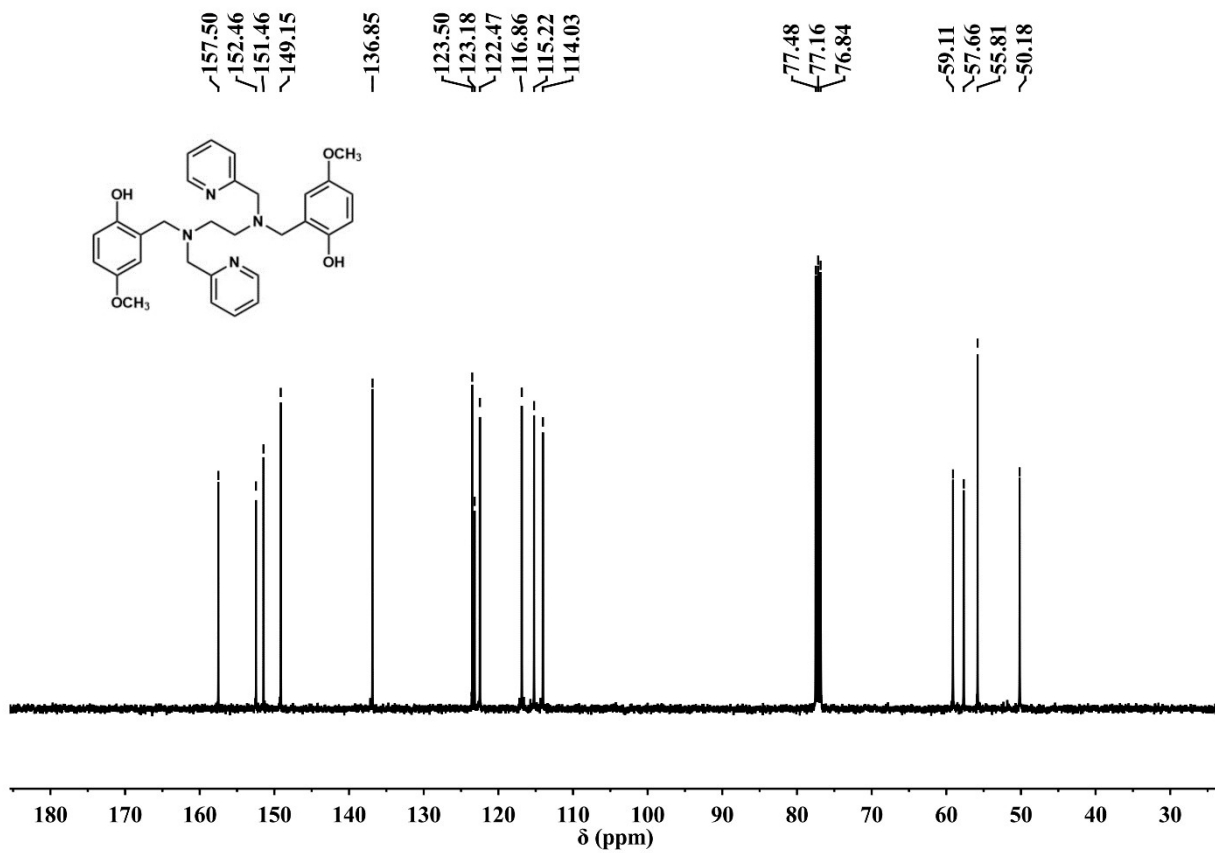

**Figure S23** <sup>13</sup>C NMR spectra of 5-OMe-H<sub>2</sub>bbpen in CDCl<sub>3</sub> at room temperature.
